1 Medullary vein architecture modulates the white matter BOLD cerebrovascular reactivity signal  
2 response to CO<sub>2</sub>: observations from high-resolution T2\* weighted imaging at 7T

3 Alex A. Bhogal<sup>1</sup>

4 <sup>1</sup> Radiology, University Medical Center Utrecht

5 Heidelberglaan 100

6 3584 CX

7 Utrecht, The Netherlands

8

9 Keywords: cerebrovascular reactivity, CVR, white matter, hypercapnia 7 tesla, MRI

10

11

12

13

14

15

16

17

18

19

20

21

## 22 **ABSTRACT**

23 Brain stress testing using blood oxygenation level-dependent (BOLD) MRI to evaluate changes in  
24 cerebrovascular reactivity (CVR) is of growing interest for evaluating white matter integrity. However,  
25 even under healthy conditions, the white matter BOLD-CVR response differs notably from that observed  
26 in the gray matter. In addition to actual arterial vascular control, the venous draining topology may  
27 influence the WM-CVR response leading to signal delays and dispersions. These types of alterations in  
28 hemodynamic parameters are sometimes linked with pathology, but may also arise from differences in  
29 normal venous architecture. In this work, high-resolution T2\*-weighted anatomical images combined  
30 with BOLD imaging during a hypercapnic breathing protocol were acquired using a 7 tesla MRI system.  
31 Hemodynamic parameters including base CVR, hemodynamic lag, lag-corrected CVR, response onset  
32 and signal dispersion, and finally  $\Delta$ CVR (corrected CVR minus base CVR) were calculated in 8 subjects.  
33 Parameter maps were spatially normalized and correlated against an MNI-registered white matter  
34 medullary vein atlas. Moderate correlations (Pearson's rho) were observed between medullary vessel  
35 frequency (MVF) and  $\Delta$ CVR (0.52; 0.58 for total WM), MVF and hemodynamic lag (0.42; 0.54 for total  
36 WM), MVF and signal dispersion (0.44; 0.53 for total WM), and finally MVF and signal onset (0.43; 0.52  
37 for total WM). Results indicate that, when assessed in the context of the WM venous architecture,  
38 changes in the response shape may only be partially reflective of the actual vascular reactivity response  
39 occurring further upstream by control vessels. This finding may have implications when attributing  
40 diseases mechanisms and/or progression to presumed impaired WM BOLD-CVR.

## 41 **INTRODUCTION**

42 Vascular reactivity mapping using blood oxygenation level-dependent (BOLD) magnetic resonance  
43 imaging (MRI) in combination with a vasoactive stimulus is of increasing interest for clinical investigation  
44 of a wide range of cerebrovascular diseases. Of particular interest is the relationship between the BOLD

45 cerebrovascular reactivity (-CVR) response<sup>1</sup> with white matter (WM) integrity as a means through which  
46 to better understand or predict the development of WM lesions<sup>2-4</sup>. A recurring assumption is that  
47 factors governing the signal characteristics in WM are arterial in origin and should be compared against  
48 the response of the gray matter (GM). It follows then that deviations from the GM reference response  
49 may indicate impairment, flow redistribution<sup>5</sup>, variable CO<sub>2</sub> sensitivity<sup>6</sup>, or differences in the rate of the  
50 vascular response<sup>7</sup>. This work proposes that an additional component, related to how venous blood is  
51 drained from WM tissue, modulates the WM BOLD-CVR to stimulus separate from factors related to  
52 direct arterial control.

53 GM cortical arteries are organized centripetally (towards the center); arteries penetrate from the pial  
54 surface towards the center of the brain while branching within the cortex. In some cases, these vessels  
55 may also penetrate the sub-cortical WM. In this superficial brain region, drainage occurs centrifugally  
56 (away from the center) as associated veins carry blood back to the pial surface and eventually the  
57 superior sagittal sinus via the intra-cortical, subcortical, and superficial medullary veins<sup>8,9</sup>. In deeper WM  
58 regions, blood is drained centripetally. This pattern is clear when observing the medullary veins that  
59 originate 1-2cm below the cortex and drain via the subependymal veins lateral to the ventricles (see  
60 figure 1)<sup>10</sup>. This organization, which distinctly demarcates superficial and deep cerebral drainage  
61 networks<sup>8</sup>, is sometimes connected by short anastomotic medullary veins and trans cerebral veins that  
62 link the pial and subependymal veins<sup>8</sup>. Collateral drainage between these networks is limited. Moving  
63 inwards towards the ventricles, specific vein structures of the deep drainage system are classified by 4  
64 convergence zones<sup>11</sup> (see figure 1 in Taoka et. al 2017<sup>10</sup> and for an overview of venous drainage in the  
65 cerebrum see the introduction of Khalatbari et al. 2021<sup>9</sup>). Based on high-resolution T2\* weighted  
66 imaging, it is possible to distinguish structural elements related to zones 2 through 4 (figure 1)<sup>8</sup>.

67 The relationship between auto-regulatory control vessels and the venous structures that drain from  
68 associated tissues differs between the superficial and deep networks. The cortical and sub-cortical  
69 arterioles/capillaries run near their superficial draining veins/veinules<sup>12</sup>. This tight coupling is essential  
70 due to the high energy, and auto-regulatory demand of the neuronal tissue and also means that de-  
71 oxyhemoglobin (dHb) mediated BOLD contrast changes in the cortex provide a relatively specific  
72 representation of local auto-regulatory control. It is also worth noting that cortical physiology leads to a  
73 several-fold increase in vascular density in superficial regions as compared to the deeper brain regions<sup>13</sup>,  
74 <sup>14</sup>. An additional consequence is that medullary veins draining the deep WM may pool blood from distal  
75 control vessels. In some cases, venous blood will traverse several zones of convergence before finally  
76 congregating at the subependymal veins.

77 The deep venous architecture has two implications concerning the WM BOLD-CVR contrast. The first  
78 being that large vessel density increases when moving inwards towards the ventricles, and the second  
79 being that aggregation of dHb through convergence in deep medullary veins will lead to BOLD-CVR  
80 signal delays and/or dispersion. While the grey matter BOLD-CVR response represents a robust  
81 surrogate for CVR mediated blood flow changes, the white matter response is nuanced and reflects  
82 multi-component behavior rooted in the initial control vessel response (i.e. true CVR) and then the  
83 downstream pooling behavior of the blood. If this is the case, then it obliges extra consideration when  
84 attributing changes in WM BOLD-CVR response shape, magnitude, and rate as possible pathological  
85 mechanisms.

86 To further investigate this notion, the vascular responses generated using hypercapnic-BOLD imaging  
87 were contextualized using high-resolution T2\* weighted imaging at 7 tesla. In addition to standard CVR  
88 maps generated using a controlled CO<sub>2</sub> stimulus, maps of hemodynamic lag, lag-corrected CVR, signal  
89 onset, and dispersion were created. Parameter maps were compared with minimum intensity

90 projections (MinIP) of venous structures derived from anatomical scans. This was driven by the  
91 hypothesis that differences in parametric response measures would spatially correlate with venous  
92 features described above. Finally, maps were registered to MNI space and correlated against a high-  
93 resolution medullary vein frequency atlas<sup>15</sup>.

## 94 **METHODS**

95 This was a retrospective study in which a survey of the local imaging database identified datasets  
96 containing high-resolution dynamic BOLD imaging data (with consistent acquisition parameters) during  
97 which a controlled hypercapnic stimulus was administered. Further inclusion criteria were that  
98 participants also underwent a high-resolution T2\* weighted anatomical scan such that comparisons  
99 could be made between hemodynamic parameter maps and deep white matter vasculature. A total of 8  
100 datasets were identified (average age 31 yrs., range 19-48 yrs., 4 females). Data was acquired with  
101 approval by the medical research ethics committee of University Medical Center Utrecht and written  
102 informed consent was obtained from all subjects. The experiments were performed according to the  
103 guidelines and regulations of the WMO (Wet Medisch Wetenschappelijk Onderzoek) and conforming to  
104 the declaration of Helsinki. All datasets have been used, at least in part, in previous publications<sup>16,17</sup>. In  
105 this work, a series of new and original (re-)analyses were performed.

## 106 **Data Acquisition**

107 MRI acquisition was done using a Philips 7 tesla MRI scanner (Philips, Best, The Netherlands) using a 32  
108 channel receive coil in combination with a volume transmit coil (Nova Medical, Wilmington, MA, USA).  
109 Third-order image-based shimming was performed. Imaging data consisted of a high-resolution 3D  
110 multi-shot GE-EPI T2\* weighted anatomical acquisition<sup>18</sup> (flip angle: 24°, TR/TE: 77/27 ms, EPI factor: 13,  
111 SENSE factor RL/FH: 2.3/1, reconstructed resolution: 0.5 mm isotropic, FOV: 240 x 150 x 192 mm<sup>3</sup>,  
112 acquisition matrix: 480 x 381 x 300 mm<sup>3</sup>, scan duration: 385 s) and a dynamic Blood Oxygenation Level

113 Dependent (BOLD) acquisition (Multi-slice single-shot GE-EPI BOLD images (flip angle: 90°, TR/TE  
114 3000/25 ms, EPI/SENSE factor 47/3, reconstructed resolution: 1.5 x 1.5 mm<sup>2</sup>, slice thickness: 1.6 mm,  
115 FOV: 217.6 x 192 mm<sup>2</sup>, acquisition matrix: 133 x 120, slices: 43). Arterial gases were manipulated during  
116 the BOLD scan using a third-generation RespirAct system (Thornhill Medical, Toronto, Canada) in  
117 combination with a rebreathing facemask. Two hypercapnic respiratory protocols were implemented  
118 within the included datasets. In three datasets a single 120s hypercapnic stimulus was administered  
119 interleaved with 120 second baseline periods. The remaining datasets used a respiratory paradigm  
120 consisting of 90s baseline periods interleaved with 90s hypercapnic, hyperoxic and hypercapnic-  
121 hyperoxic blocks, respectively. While it has been shown that the nature of the vasoactive stimulus can  
122 modulate hemodynamic parameter maps, this work aimed to evaluate the spatial distribution of various  
123 responses. Considering this, the inclusion of data derived using different hypercapnic paradigms was  
124 considered acceptable.

## 125 **Data Processing**

126 Initial processing of the BOLD data consisted of brain extraction (BET<sup>19</sup>), motion correction (MCFLIRT<sup>20</sup>),  
127 and segmentation (FAST<sup>21</sup>) using FSL (FMRIB, Oxford, UK)<sup>22</sup>. Motion corrected BOLD data was then  
128 ‘scrubbed’ using functions included in the seeVR toolbox (seeVR, Utrecht, The Netherlands)<sup>23</sup>. This data  
129 cleaning step (outlined in figure 2) involved using a general linear model (GLM) to remove nuisance  
130 signals identified using motion parameters and their derivatives (time derivative, square), a linear drift  
131 term (1<sup>st</sup> order Legendre polynomial), and the individual PetO<sub>2</sub> trace measured by the RespirAct.  
132 Regressing out the O<sub>2</sub> information ensured that further analysis was weighted primarily towards the  
133 vasodilatory effect of the hypercapnic stimulus. The regression of the PetO<sub>2</sub> information was not  
134 included for the three normoxic datasets in which only a hypercapnic stimulus was applied. The  
135 associated Pet CO<sub>2</sub> trace was convolved with a series of six double-gamma HRF functions (see equation

136 1:  $\alpha_1 = 1, \beta_1 = 1-6, \alpha_2 = 1, \beta_2 = 1$ )<sup>24</sup> with increasing dispersion properties to simulate the ‘spreading-out’  
137 of the WM BOLD-CVR response to step-changes in arterial CO<sub>2</sub><sup>7</sup>; these convolved traces were then  
138 included in the GLM as explanatory variables. After running the GLM, the sum of the variance explained  
139 by the nuisance regressors was subtracted from the input data to generate the ‘cleaned’ BOLD data to  
140 be used for further analysis.

#### 141 **Hemodynamic lag mapping**

142 Hemodynamic lag maps were generated based on a modified RAPIDTIDE approach<sup>25, 26</sup> implemented in  
143 the seeVR toolbox. First, a manual bulk alignment between the PetCO<sub>2</sub> trace and the average GM BOLD  
144 signal was performed. This manual approach minimized alignment errors that can occur due to noise or  
145 spike artifacts when using automated cross-correlation. The BOLD time-series data and PetCO<sub>2</sub> traces  
146 were then linearly interpolated by a factor of 4 (effective TR: 0.75 s). The PetCO<sub>2</sub> trace was then used as  
147 a seed to generate an optimized BOLD signal regressor<sup>26</sup>. GM voxels within a time-shift of -1 to 2 TRs (-3  
148 to 6 seconds) and showing a correlation of <0.7 were temporally aligned and principal component  
149 analysis (PCA) was applied to identify the components that explained at least 85% of the signal variance.  
150 These principle components were then extracted to form a new seed trace. This process was iterated  
151 until the root mean squared error (RMSE) between subsequent traces converged to less than 0.005.  
152 Next, the final trace (optimized BOLD regressor) was cross-correlated against each brain voxel and the  
153 temporal signal lag was determined based on the maximum correlation value.

#### 154 **CVR mapping**

155 To generate the standard base CVR map (i.e. without accounting for WM hemodynamic lag), the bulk-  
156 aligned PetCO<sub>2</sub> trace was regressed against each voxel of the baseline-normalized cleaned BOLD data.  
157 The slope of this linear regression was taken as the CVR in units of percent signal change per mmHg  
158 increase in CO<sub>2</sub>. Corrected CVR maps were generated by shifting the bulk-aligned PetCO<sub>2</sub> trace according

159 to the voxel-wise hemodynamic lag before performing the linear regression. Finally, a CVR difference  
160 map, from now on referred to as the  $\Delta$ CVR map, was calculated by subtracting the base CVR map from  
161 the lag-corrected CVR map. Detailed reports of GM CVR from this (or a subset) data have been  
162 previously reported<sup>5, 16</sup>

### 163 **Onset and dispersion mapping**

164 The double gamma function used to produce onset and dispersion maps is expressed as:

$$165 \quad s(t) = \frac{t^{(\alpha_1-1)}\beta_1^{-\alpha_1}e^{-\beta_1^{-1}t}}{\gamma(\alpha_1)} - \frac{t^{\alpha_2-1}\beta_2^{-\alpha_2}e^{-\beta_2^{-1}t}}{\delta\gamma(\alpha_2)} \quad (1)$$

166 Where the  $\alpha_{1,2}$  parameters model a global signal shift or onset ( $\alpha_1$  is set equal to  $\alpha_2$ )<sup>24</sup>,  $\beta_1$  models the  
167 signal dispersion,  $\beta_2$  models the undershoot and  $\delta$  modulates a vertical signal dispersion. For CO<sub>2</sub>  
168 mediated BOLD responses, no undershoot is expected and so  $\beta_2$  was set equal to 1. To limit vertical  
169 dispersion, the  $\delta$  parameter was set to 1000; this also restricted the overall contribution of the second  
170 gamma function for simplicity. The range of  $\alpha_{1,2}$  was set from 1-2 in increments of 0.2 and the range of  
171  $\beta_1$  was set from 1 to 200 in increments of 2.

172 Previously HRFs have been convolved with the PetCO<sub>2</sub> trace to model the possible BOLD signal  
173 response<sup>7</sup>. However, it was apparent that the optimized BOLD signal regressor provided a more suitable  
174 archetype for the direct response of highly reactive vessels to changes in arterial CO<sub>2</sub>. Therefore, the  
175 optimized probe was taken as an initial reference point (instead of the PetCO<sub>2</sub> trace) from which point  
176 the voxel-wise changes in onset or dispersion were investigated. In doing this, any modulations of the  
177 blood CO<sub>2</sub> bolus (as defined by the PetCO<sub>2</sub>) occurring between the lungs and brain did not warrant  
178 consideration when modeling the brain response. This process generated a series of 600 HRF functions  
179 that were fit to each voxel time-series using a least-squares method. The onset and dispersion



180 parameters correspond to the HRF with the highest  $R^2$  were then chosen to generate onset and  
181 dispersion maps. Example HRF functions and their convolutions are provided in supplementary figure 1.

## 182 **Image processing**

183 Hemodynamic parameter maps were co-registered to the T2\* anatomical image via the associated  
184 mean BOLD image using a linear transformation (FLIRT: 9 parameters, mutual information, trilinear  
185 interpolation). Processing of the T2\* anatomical data consisted of brain extraction (BET) and  
186 segmentation with bias field removal (FAST). The bias-field removed T2\* image was then used to  
187 generate a minimum intensity projection (MinIP) image to highlight venous structures. For this, the  
188 minimum intensity value through a stack of 8 slices above and below each slice (17 slices, 9.5mm slab)  
189 of interest was projected. It should be noted that using the bias-field corrected image made little  
190 difference as compared to using the original T2\*.

191 The T2\* anatomical image was then registered to a 1mm T2-weighted version of the MNI152 atlas<sup>27</sup>  
192 using an affine registration with 12 degrees of freedom (FLIRT) followed by a non-linear registration  
193 (FNIRT<sup>28</sup>). Both the linear transformation matrix and non-linear warp fields were then applied to the  
194 T2\*-registered hemodynamic parameter maps to bring them to MNI space. All maps were subsequently  
195 averaged such that the WM parameters could be evaluated in the context of medullary vein frequency  
196 using a high-resolution medullary vein atlas<sup>15</sup>. This atlas is expressed in units of 'counts' and is based on  
197 a dataset of 30 subjects scanned using the same 7 T scanner and a similar T2\*-weighted sequence as the  
198 one used to acquire the data presented in this study.

## 199 **Statistical analysis**

200 Considering the aim to investigate the spatial correlation between white matter venous topology and  
201 hemodynamic responses, the distributions of MNI-registered parameter maps were compared with the

202 vessel frequency expressed in the medullary vein atlas. WM regions with significant medullary vein  
203 content were isolated in a 20mm slab beginning at the top of the ventricles (between slices 102-122 in  
204 the MNI volume; see supplementary figure 2). Heat-scatter plots of hemodynamic parameters versus  
205 vein frequency were generated and the Pearson correlation coefficient ( $\rho$ ,  $r$ ) for overlapping voxels  
206 was determined. For correlation calculations involving the medullary atlas, a second atlas was generated  
207 in which all WM regions were included. This served as a proxy to evaluate relationships in voxels with  
208 presumably low vessel density (i.e. first to second zones of convergence; figure 1) that were not  
209 encompassed by the medullary mask. Correlation values below 0.39 were considered weak. Values from  
210 0.4-0.59 were considered moderate. Values from 0.6 and 0.79 were considered strong and values above  
211 0.8 were considered very strong. A supplementary correlation analysis was performed to examine the  
212 relationships between different hemodynamic parameters.

## 213 **RESULTS**

214 The average baseline PetCO<sub>2</sub> value across all participants was approximately 34.8 mmHg. The average  
215 PetCO<sub>2</sub> value during the hypercapnic stimulus across all participants was 44.4 mmHg (for the five  
216 participants that experienced two hypercapnic blocks, the average value of both was taken). The  
217 average increase in PetCO<sub>2</sub> between baseline and stimulus periods across all participants was  
218 approximately 9.5 mmHg.

219 Both hemodynamic lag analysis and signal dispersion modeling highlighted heterogeneous temporal  
220 responses in the WM in concordance with previous reports<sup>5-7</sup>. Visual inspection of single-subject data  
221 indicated higher lag and dispersion values localized centrally in regions above the ventricles and  
222 dispersing radially at points parallel to the ventricles (see figures 3 and 4). Moving towards the sub-  
223 cortical white matter, lag and dispersion values became lower. This was also the case for the calculated  
224  $\Delta$ CVR that generally associated spatially with the lag/dispersion. In the context of the venous topology,

225  $\Delta$ CVR, lag, and dispersion were lower around the assumed first zone of convergence until the transition  
226 regions between the first and second zones. This is emphasized in figure 3A (white arrows), where both  
227 the base CVR and lag-corrected CVR remain low. When comparing these regions against the MinIP,  
228 there appear to be no large visible veins.

229 Spatial patterns observed in single subject datasets remained consistent in the MNI-averaged maps  
230 (figure 5). The Pearson's correlation value calculated between  $\Delta$ CVR and the medullar frequency was  
231 0.52 (0.58 when including all WM voxels). When comparing hemodynamic lag, the correlation  
232 coefficient was 0.42 (0.54 when including all WM voxels). For the dispersion and onset parameters, the  
233 Pearson correlation values were 0.44 (0.53 when including all WM voxels) and 0.43 (0.52 when including  
234 all WM voxels), respectively. Therefore, all hemodynamic parameters considered showed a moderate  
235 correlation indicating positive relationships with the frequency of medullary veins (figure 5).

236 A secondary analysis was performed to compare the relationships between various hemodynamic  
237 parameters within the region defined by the medullary atlas. The Pearson value when comparing the  
238 dispersion and  $\Delta$ CVR parameters against the hemodynamic lag showed a strong correlation at 0.70 and  
239 0.75, respectively. Finally, the lag-corrected CVR showed a very strong correlation with the base CVR  
240 with a Pearson value of 0.94. This was expected, but highlights changes that can occur to CVR after  
241 correcting for lag. Scatter plots are provided in supplementary figure 2B.

242 A two-tailed t-test performed for each correlation showed that all were significantly different from the  
243 null hypothesis of zero correlation ( $p$ -value > 0.01).

## 244 **DISCUSSION**

245 In this retrospective work, high-resolution T2\*-weighted anatomical and functional imaging was applied  
246 to investigate the properties of the WM BOLD-CVR response to a vasoactive stimulus. The application of

247 advanced hemodynamic analysis provided parametric maps of voxel-wise CVR, hemodynamic lag, lag-  
248 corrected CVR, signal onset and dispersion, and finally the  $\Delta$ CVR. The main finding reported herein was  
249 that parametric maps showed moderate positive correlations with the frequency of the larger medullary  
250 veins responsible for draining much of the WM tissue. In light of the physical principles underpinning the  
251 BOLD signal contrast, this finding supports the hypothesis that drainage topology plays an important  
252 role in determining WM BOLD-CVR characteristics that might otherwise be attributed solely to auto-  
253 regulatory dilation or constriction.

254 For healthy subjects, CBF<sup>29</sup> and CMRO<sub>2</sub><sup>30, 31</sup> are considerably lower in WM as compared to GM. Several  
255 studies have reported non-significant differences in the oxygen extraction fraction (OEF) between WM  
256 and GM in healthy subjects (see meta-analysis presented in Fan et al. 2020<sup>32</sup>) indicating a regional  
257 equilibrium between CBF and CMRO<sub>2</sub>. It follows that changes in venous hemoglobin saturation, along  
258 with venous CBV, will drive the WM BOLD signal contrast under hypercapnia. Moreover, as shown with  
259 ASL-based methods<sup>29</sup>, relatively low perfusion means that the WM BOLD contrast-to-noise (CNR; or  
260 detection sensitivity) is limited compared to GM, even at high magnetic field strength. While factors  
261 related to the true arterial response to CO<sub>2</sub> (i.e. speed, flow distribution, CO<sub>2</sub> sensitivity) will determine  
262 the venous hemodynamic input conditions, the accumulation of dHb in progressively larger collecting  
263 veins will modulate the WM BOLD-CVR response shape. A corollary is the impact of large draining veins  
264 that can reduce the specificity of cortical fMRI responses. Supplementary figure 3 provides an example  
265 of signal dispersion seen when comparing the total GM BOLD response to the response measured in a  
266 downstream region of the superior sagittal sinus. In the case of certain WM regions, large draining veins  
267 rather than control vessels may dominate response properties leading to lag and dispersion. This is partly  
268 due to due to the overall low vascular density in WM tissue. A conceptual explanation of how WM  
269 drainage properties influence the CVR response is shown in figure 6.

270 Progressive pooling of dHb as the blood drains through the venous tributaries towards the  
271 subependymal veins has two important consequences. First, the total amount of dHb increases as blood  
272 moves away from superficial WM (below the sub-cortical WM) towards the larger peri-ventricular  
273 medullary veins. In these central regions, both the blood volume fraction and total dHb concentration  
274 may evoke a stronger BOLD signal effect as increased CBF reduces the OEF at capillary beds. Second, as  
275 the venous blood drains, it moves away from the actual site of arterial reactivity leading to a potential  
276 delocalization of the CVR signal response. Particularly since intravenous signal contributions from large  
277 veins medullary can dominate the BOLD signal response at lower fields<sup>33</sup>. This effect can be exacerbated  
278 by partial volume effects due to large voxels sizes ( $\sim 3 \text{ mm}^3$ ) and large smoothing kernels ( $5\text{-}8\text{mm}^2$ ) that  
279 are typically applied in CVR studies using clinical 3T MRI systems.

280 In light of this new perspective, integrating knowledge of venous organization may aid in sharpening the  
281 application of CVR as a biomarker for diseases affecting the WM. Particularly in the case of medullary  
282 veins, whose characteristics have been shown to provide prognostic information in patients that have  
283 suffered from stroke<sup>34</sup>, and have been linked to a variety of disorders<sup>10</sup>. It is important to distinguish the  
284 absence of a BOLD-CVR response due to low perfusion or low blood volume from arterial aspects or  
285 actual impairments in the vascular ability to respond to a stimulus. Techniques to achieve might include  
286 scans that are sensitive to blood volume, or the rate-of-change in blood volume. For example,  
287 displacement encoding via stimulated echoes (DENSE)<sup>35, 36</sup> MRI might reveal whether fast volume  
288 changes occur long before the presumably dispersed (or lagged) BOLD effects. To better understand  
289 possible large vein contributions, the acquisition of complimentary high-resolution anatomical T2\*-  
290 images or susceptibility-weighted images SWI is recommended.

## 291 **Limitations**

292 The use of the HRF-convolved data probes (figure 2B) can aid in restricting the variance explained by  
293 nuisance signals. This analysis step was inspired by the approach of convolving a design matrix with an  
294 assumed HRF function when modeling stimulus-response in task-based fMRI. However, increasing the  
295 complexity of the GLM will influence the residual data used to generate hemodynamic maps (figure 2C).  
296 The same may hold for ambiguities related to the linear model used to account for possible drift in the  
297 MR signal and BOLD signal drift arising due to endogenous CO<sub>2</sub> accumulation or increased minute  
298 ventilation. Correct nuisance signal regression is a subject of debate in the field of fMRI and remains an  
299 open question in the context of BOLD-CVR response to hypercapnia. One way to minimize potential  
300 errors in BOLD-CVR experiments is the inclusion of multiple hypercapnic periods in a run as presented by  
301 Poublanc et. al<sup>7</sup> and as applied in five of the subjects in this study. Including multiple transitions can  
302 provide a means through which to ‘regularize’ the GLM fit and avoid mischaracterizing low CNR signals  
303 for excessively dispersed signals. Accordingly, the inclusion of two different CO<sub>2</sub> breathing protocols in  
304 this study (one block versus two) may have increased the variance in the presented data.

305 Another source of variance is related to the use of the medullary atlas. While this atlas was produced  
306 using the same MR system and a very similar acquisition sequence, it was not specifically generated  
307 using the datasets included in this study, nor was it created with the property to distinguish smaller  
308 vessels located around the first and second zones of convergence. Considering that the focus of this  
309 work was on the spatial relationship between hemodynamic patterns and venous topology, and since  
310 the amount of available data in this retrospective study was limited, this variation was accepted.

311 Finally, as with cortical fMRI, acquisitions with higher spatial resolutions can reduce localization errors<sup>37</sup>  
312 related to the WM BOLD-CVR response that may be dominated by larger medullary draining veins. Ultra-  
313 high field MR systems are appealing for this reason. For clinical MR systems, the loss in SNR can be  
314 mitigated by using longer TR and increasing the duration of hypercapnic periods for more signal

315 averaging. This approach will come at the expense of temporal fidelity, which may be recovered by using  
316 high acceleration factors (again, at the expense of SNR).

### 317 **Conclusion**

318 The confluence of arterial hemodynamics and BOLD signal characteristics weighted by venous  
319 architecture unrelated to smooth-muscle mediated dilation/contraction play a significant role in  
320 defining the WM BOLD-signal response to hypercapnia. This caveat should be taken into account when  
321 attributing diseases mechanisms and/or progression to presumed impaired WM BOLD-CVR.

### 322 **Acknowledgments**

323 The author thanks Hans Hoogduin and Marielle Philippons for their mentorship and supervision during  
324 the period in which the data used in this study was acquired. Also thanks to Wouter Schellekens, Mario  
325 Gilberto Báez Yáñez and Jaco J.M. Zwanenburg for valuable discussions, and Hugo Kuijf for providing the  
326 medullar vein atlas.

327 **Declarations of interest:** none

### 328 **Data and code availability**

329 The analysis tools used to generate the results presented in this manuscript are freely available via the  
330 open-source seeVR toolbox (<https://github.com/abhogal-lab/seeVR>). MRI and physiological data can be  
331 made available based on the submission of a formal project outline.

### 332 **Funding**

333 This work was supported by a Dutch research council talent grant awarded to Alex A. Bhogal (NWO  
334 VENI: *The ischemic fingerprint*, file number 016.Veni.188.043)

## References

- 335 1. Fisher JA, Sobczyk O, Crawley A, et al. Assessing cerebrovascular reactivity by the pattern of  
336 response to progressive hypercapnia. *Human Brain Mapping*. 2017; 38: 3415-27.
- 337 2. Sam K, Peltenburg B, Conklin J, et al. Cerebrovascular reactivity and white matter integrity.  
338 *Neurology*. 2016; 87: 2333-9.
- 339 3. Sam K, Crawley AP, Conklin J, et al. Development of White Matter Hyperintensity Is Preceded by  
340 Reduced Cerebrovascular Reactivity. *Annals of Neurology*. 2016; 80: 277-85.
- 341 4. Liem MK, Lesnik Oberstein SA, Haan J, et al. Cerebrovascular reactivity is a main determinant of  
342 white matter hyperintensity progression in CADASIL. *AJNR American journal of neuroradiology*. 2009;  
343 30: 1244-7.
- 344 5. Bhogal AA, Philippens ME, Siero JC, et al. Examining the regional and cerebral depth-dependent  
345 BOLD cerebrovascular reactivity response at 7T. *Neuroimage*. 2015; 114: 239-48.
- 346 6. Thomas BP, Liu P, Park DC, van Osch MJP and Lu H. Cerebrovascular Reactivity in the Brain  
347 White Matter: Magnitude, Temporal Characteristics, and Age Effects. *Journal of Cerebral Blood Flow &*  
348 *Metabolism*. 2013; 34: 242-7.
- 349 7. Poublanc J, Crawley AP, Sobczyk O, et al. Measuring cerebrovascular reactivity: the dynamic  
350 response to a step hypercapnic stimulus. *Journal of cerebral blood flow and metabolism : official journal*  
351 *of the International Society of Cerebral Blood Flow and Metabolism*. 2015; 35: 1746-56.
- 352 8. Okudera T, Huang YP, Fukusumi A, Nakamura Y, Hatazawa J and Uemura K. Micro-angiographical  
353 studies of the medullary venous system of the cerebral hemisphere. *Neuropathology : official journal of*  
354 *the Japanese Society of Neuropathology*. 1999; 19: 93-111.
- 355 9. Khalatbari H, Wright JN, Ishak GE, Perez FA, Amlie-Lefond CM and Shaw DWW. Deep medullary  
356 vein engorgement and superficial medullary vein engorgement: two patterns of perinatal venous stroke.  
357 *Pediatric radiology*. 2021; 51: 675-85.
- 358 10. Taoka T, Fukusumi A, Miyasaka T, et al. Structure of the Medullary Veins of the Cerebral  
359 Hemisphere and Related Disorders. *Radiographics : a review publication of the Radiological Society of*  
360 *North America, Inc*. 2017; 37: 281-97.
- 361 11. Huang YP, Okudera T, Fukusumi A, et al. Venous architecture of cerebral hemispheric white  
362 matter and comments on pathogenesis of medullary venous and other cerebral vascular malformations.  
363 *The Mount Sinai journal of medicine, New York*. 1997; 64: 197-206.
- 364 12. Duvernoy HM, Delon S and Vannson JL. Cortical blood vessels of the human brain. *Brain*  
365 *research bulletin*. 1981; 7: 519-79.
- 366 13. Vigneau-Roy N, Bernier M, Descoteaux M and Whittingstall K. Regional variations in vascular  
367 density correlate with resting-state and task-evoked blood oxygen level-dependent signal amplitude.  
368 *Human Brain Mapping*. 2014; 35: 1906-20.
- 369 14. Bernier M, Cunnane SC and Whittingstall K. The morphology of the human cerebrovascular  
370 system. *Human Brain Mapping*. 2018; 39: 4962-75.
- 371 15. Kuijf HJ, Bouvy WH, Zwanenburg JJ, et al. Quantification of deep medullary veins at 7 T brain  
372 MRI. *European radiology*. 2016; 26: 3412-8.
- 373 16. Bhogal AA, Siero JC, Fisher JA, et al. Investigating the non-linearity of the BOLD cerebrovascular  
374 reactivity response to targeted hypo/hypercapnia at 7T. *Neuroimage*. 2014; 98: 296-305.
- 375 17. Champagne AA and Bhogal AA. Insights Into Cerebral Tissue-Specific Response to Respiratory  
376 Challenges at 7T: Evidence for Combined Blood Flow and CO(2)-Mediated Effects. *Frontiers in*  
377 *physiology*. 2021; 12: 601369.
- 378 18. Zwanenburg JJ, Versluis MJ, Luijten PR and Petridou N. Fast high resolution whole brain T2\*  
379 weighted imaging using echo planar imaging at 7T. *Neuroimage*. 2011; 56: 1902-7.



- 380 19. Smith SM. Fast robust automated brain extraction. *Hum Brain Mapp.* 2002; 17: 143-55.
- 381 20. Jenkinson M, Bannister P, Brady M and Smith S. Improved optimization for the robust and  
382 accurate linear registration and motion correction of brain images. *Neuroimage.* 2002; 17: 825-41.
- 383 21. Zhang Y, Brady M and Smith S. Segmentation of brain MR images through a hidden Markov  
384 random field model and the expectation-maximization algorithm. *IEEE transactions on medical imaging.*  
385 2001; 20: 45-57.
- 386 22. Smith SM, Jenkinson M, Woolrich MW, et al. Advances in functional and structural MR image  
387 analysis and implementation as FSL. *Neuroimage.* 2004; 23 Suppl 1: S208-19.
- 388 23. Bhogal AA. seeVR: a toolbox for analyzing cerebrovascular reactivity data. *Zenodo.* 2021; (v1.01).
- 389 24. Yao JF, Yang HS, Wang JH, et al. A novel method of quantifying hemodynamic delays to improve  
390 hemodynamic response, and CVR estimates in CO<sub>2</sub> challenge fMRI. *Journal of cerebral blood flow and*  
391 *metabolism : official journal of the International Society of Cerebral Blood Flow and Metabolism.* 2021;  
392 41: 1886-98.
- 393 25. Champagne AA, Bhogal AA, Coverdale NS, Mark CI and Cook DJ. A novel perspective to calibrate  
394 temporal delays in cerebrovascular reactivity using hypercapnic and hyperoxic respiratory challenges.  
395 *Neuroimage.* 2017.
- 396 26. Donahue MJ, Strother MK, Lindsey KP, Hocke LM, Tong Y and Frederick BD. Time delay  
397 processing of hypercapnic fMRI allows quantitative parameterization of cerebrovascular reactivity and  
398 blood flow delays. *Journal of cerebral blood flow and metabolism : official journal of the International*  
399 *Society of Cerebral Blood Flow and Metabolism.* 2016; 36: 1767-79.
- 400 27. Fonov VS, Evans AC, McKinstry RC, Almlí CR and Collins DL. Unbiased nonlinear average age-  
401 appropriate brain templates from birth to adulthood. *Neuroimage.* 2009; 47: S102.
- 402 28. Jenkinson M, Beckmann CF, Behrens TE, Woolrich MW and Smith SM. FSL. *Neuroimage.* 2012;  
403 62: 782-90.
- 404 29. van Osch MJ, Teeuwisse WM, van Walderveen MA, Hendrikse J, Kies DA and van Buchem MA.  
405 Can arterial spin labeling detect white matter perfusion signal? *Magnetic resonance in medicine.* 2009;  
406 62: 165-73.
- 407 30. Paech D, Nagel AM, Schultheiss MN, et al. Quantitative Dynamic Oxygen 17 MRI at 7.0 T for the  
408 Cerebral Oxygen Metabolism in Glioma. *Radiology.* 2020; 295: 181-9.
- 409 31. Pantano P, Baron JC, Lebrun-Grandié P, Duquesnoy N, Bousser MG and Comar D. Regional  
410 cerebral blood flow and oxygen consumption in human aging. *Stroke.* 1984; 15: 635-41.
- 411 32. Fan AP, An H, Moradi F, et al. Quantification of brain oxygen extraction and metabolism with  
412 [15O]-gas PET: A technical review in the era of PET/MRI. *Neuroimage.* 2020; 220: 117136.
- 413 33. Kim S-G and Ogawa S. Biophysical and physiological origins of blood oxygenation level-  
414 dependent fMRI signals. *Journal of cerebral blood flow and metabolism : official journal of the*  
415 *International Society of Cerebral Blood Flow and Metabolism.* 2012; 32: 1188-206.
- 416 34. Yu X, Yuan L, Jackson A, et al. Prominence of Medullary Veins on Susceptibility-Weighted Images  
417 Provides Prognostic Information in Patients with Subacute Stroke. *American Journal of Neuroradiology.*  
418 2016; 37: 423-9.
- 419 35. Adams AL, Kuijff HJ, Viergever MA, Luijten PR and Zwanenburg JJM. Quantifying cardiac-induced  
420 brain tissue expansion using DENSE. *NMR in biomedicine.* 2019; 32: e4050.
- 421 36. Sloots JJ, Biessels GJ and Zwanenburg JJM. Cardiac and respiration-induced brain deformations  
422 in humans quantified with high-field MRI. *Neuroimage.* 2020; 210: 116581.
- 423 37. Olman CA, Inati S and Heeger DJ. The effect of large veins on spatial localization with GE BOLD at  
424 3 T: Displacement, not blurring. *Neuroimage.* 2007; 34: 1126-35.

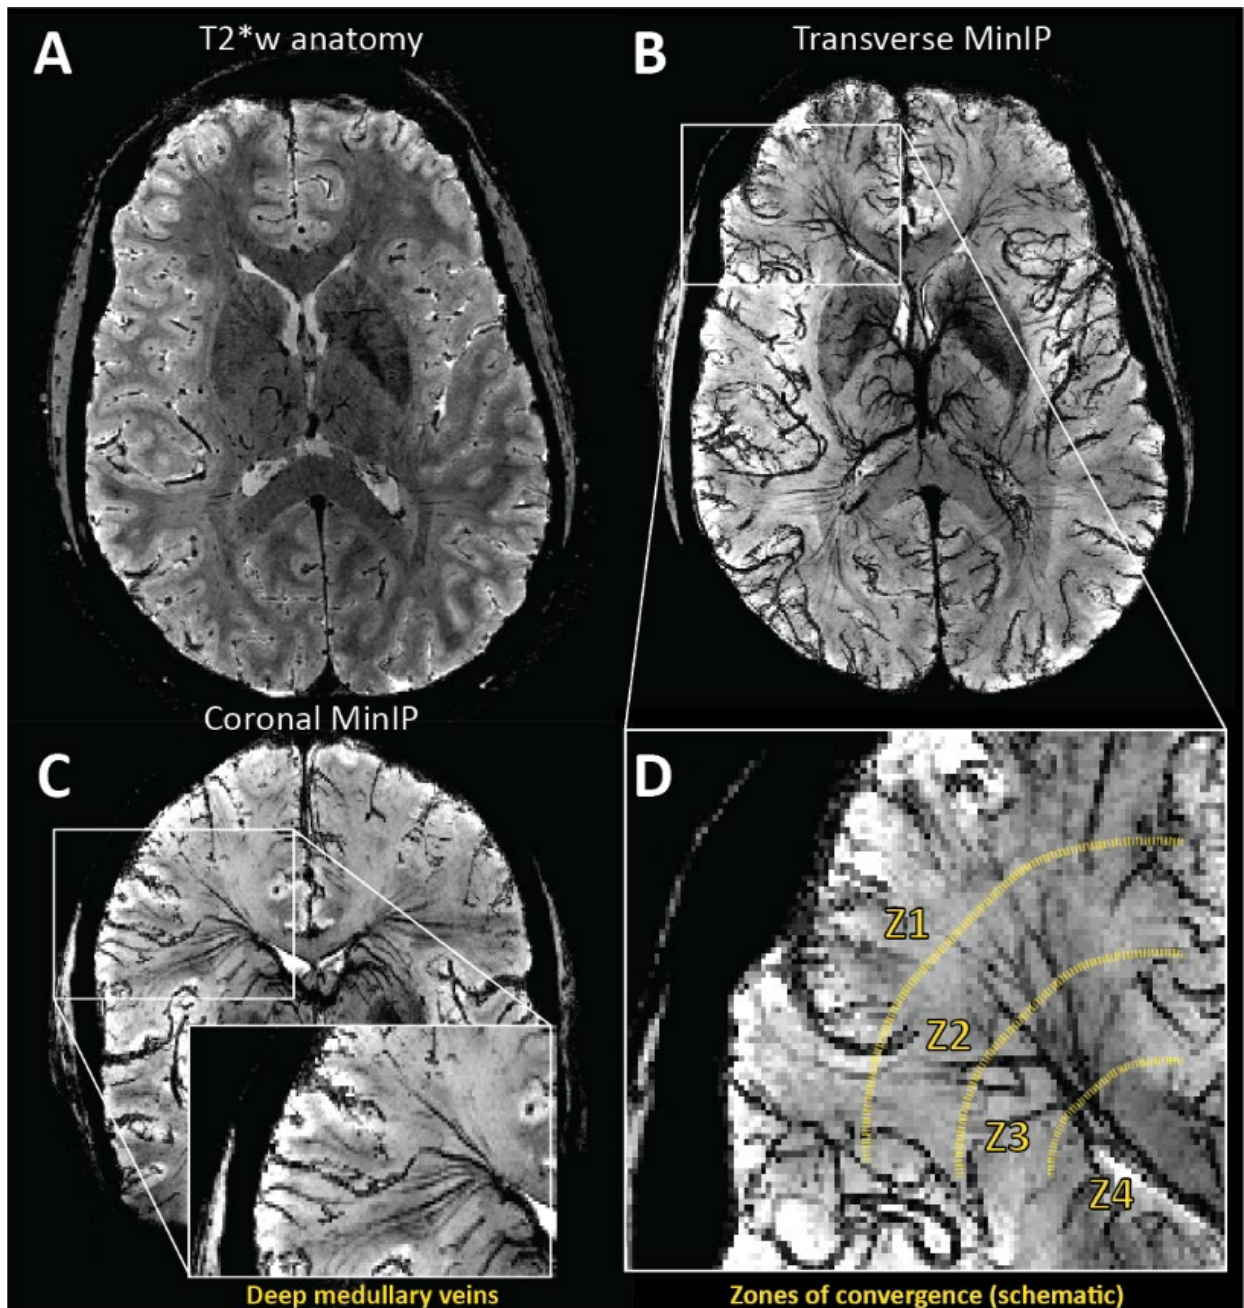

Figure 1A: High-resolution T2\*-weighted anatomical image of a representative subject. Based on this volume, a minimum intensity projection image (MinIP) is generated using 9.5mm slabs. The transverse and coronal MinIP images are shown in figure 1B and 1C, respectively. The inlay in 1C highlights the radial pattern of the large medullary veins. These veins fan outward from the ventricles to penetrate deeper white matter tissue. The expanded image in figure 1D highlights branching patterns that can be attributed to distinct convergence zones. As described by Okodura et al.<sup>8</sup>, zone 1 is characterized by the presence of superficial medullary veins and smaller branching patterns known as coat-rack and bamboo-branch unions. These structures are too fine to be resolved using MR imaging. The transition to zone 2 is mainly characterized by the candelabra structures created where laterally running tributaries converge with deeply running medullary veins. These deep medullary veins course through the third convergence zone to form palm-like unions with subependymal veins forming the fourth zone of convergence at the lateral ventricle.

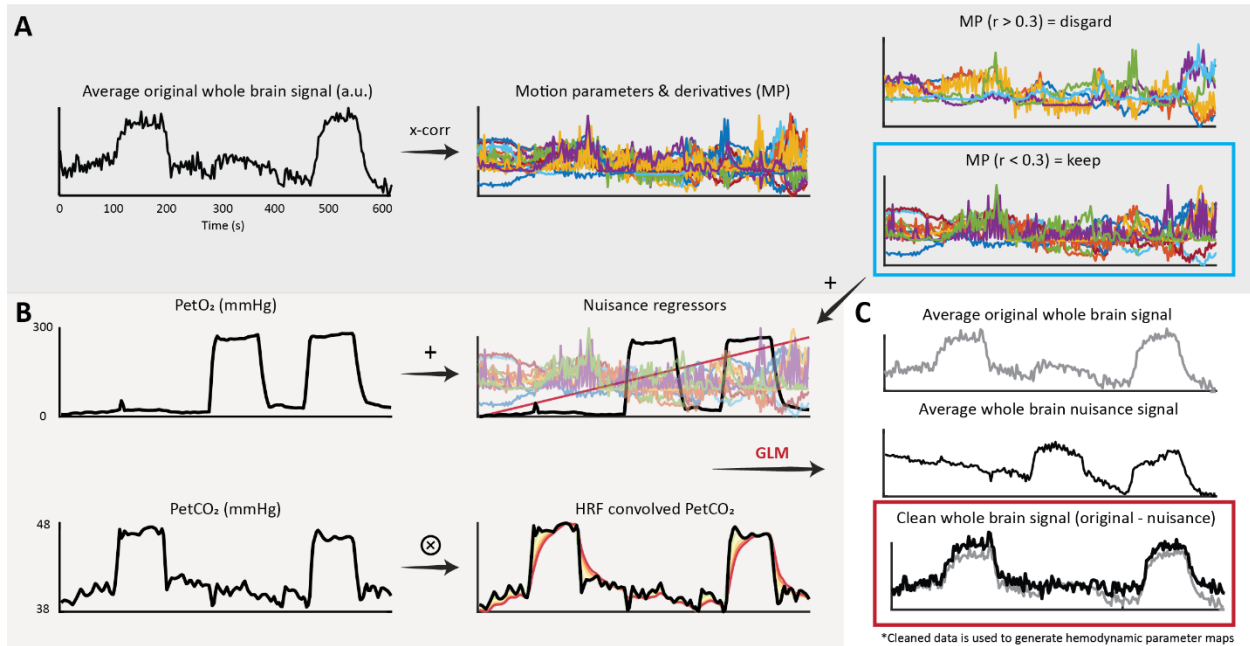

Figure 2A: Occasionally motion parameters derived using intensity-based realignment methods can correlate with the hypercapnic task. This is in addition to subject motion related to hyperventilation or the transitions between baseline and hypercapnic breathing. In this case, highly correlated nuisance signals should not be included in the GLM since they will account for some of the desired signal responses. The average whole-brain signal is cross-correlated against the motion parameters and their derivatives. Parameters with an absolute correlation higher than 0.3 were rejected, while the remaining parameters are used for data scrubbing; Figure 2B: In 5 of 8 subjects, hyperoxic blocks were administered during the breathing protocol. In these datasets, the PetO<sub>2</sub> traces were added as nuisance regressors to remove variance explained by the O<sub>2</sub> challenge. A linear term was added to account for drift. The PetCO<sub>2</sub> along with 6 HRF-convolved PetCO<sub>2</sub> traces were included to provide a priori information regarding the vascular challenge; Figure 2C: nuisance regressors and data probes were used to explain the voxel-wise BOLD responses. For each voxel, the sum of the variance explained by the nuisance regressors was removed from the original voxel signal. The resulting ‘cleaned’ data was then used for further hemodynamic analysis.

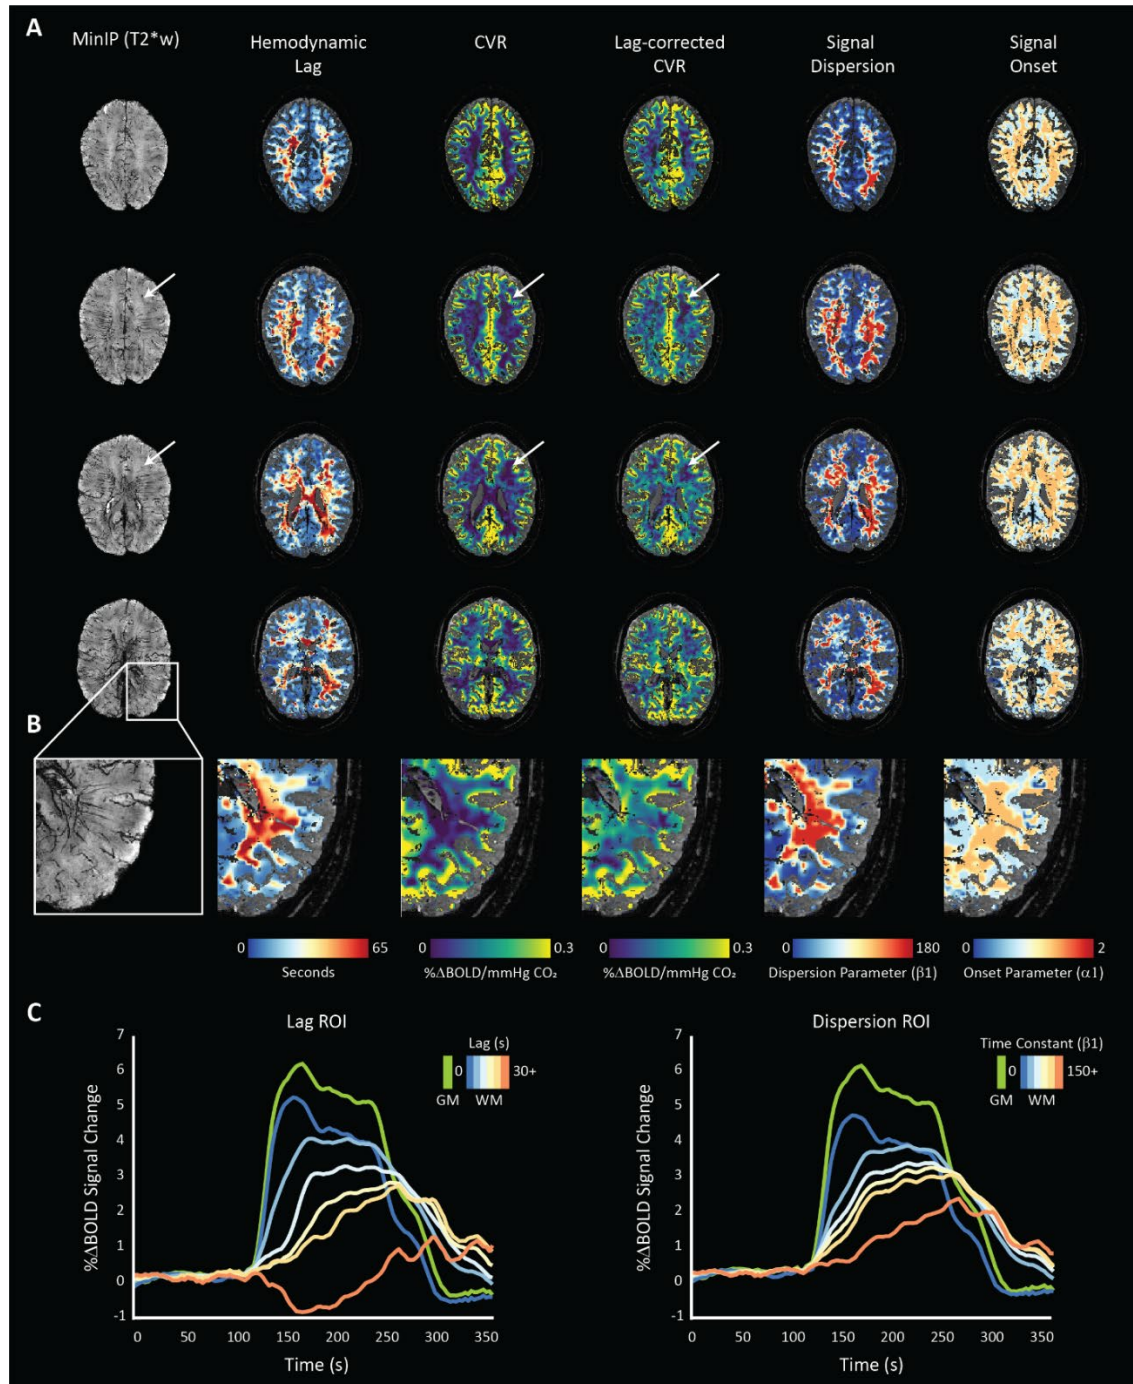

Figure 3A: the MinIP and related hemodynamic parameter maps for a representative subject (48yrs, female) undergoing the normoxic, single hypercapnic-block paradigm are shown. Increases in lag-corrected CVR spatially correlate with longer hemodynamic lag and higher signal dispersion. Moreover, a clear relationship between lag and dispersion can be seen, as expected. White arrows indicate low CVR regions that remain unaffected when correcting for signal lag. When comparing to the corresponding region in the MinIP, this area seems devoid of large vessels suggesting low BOLD CNR related to low blood volume; Figure 3B: an enlarged region of the left-posterior WM where spatial correlations between medullary vessels (left: MinIP) and various hemodynamic parameters can be inferred; Figure 3C: the normalized BOLD time-series calculated within several regions of interest defined by increasing lag (left) and dispersion (right) are shown with a GM time-series for reference (green). These time courses highlight the relationship between increasing temporal parameters and the shape of the BOLD-CVR response.

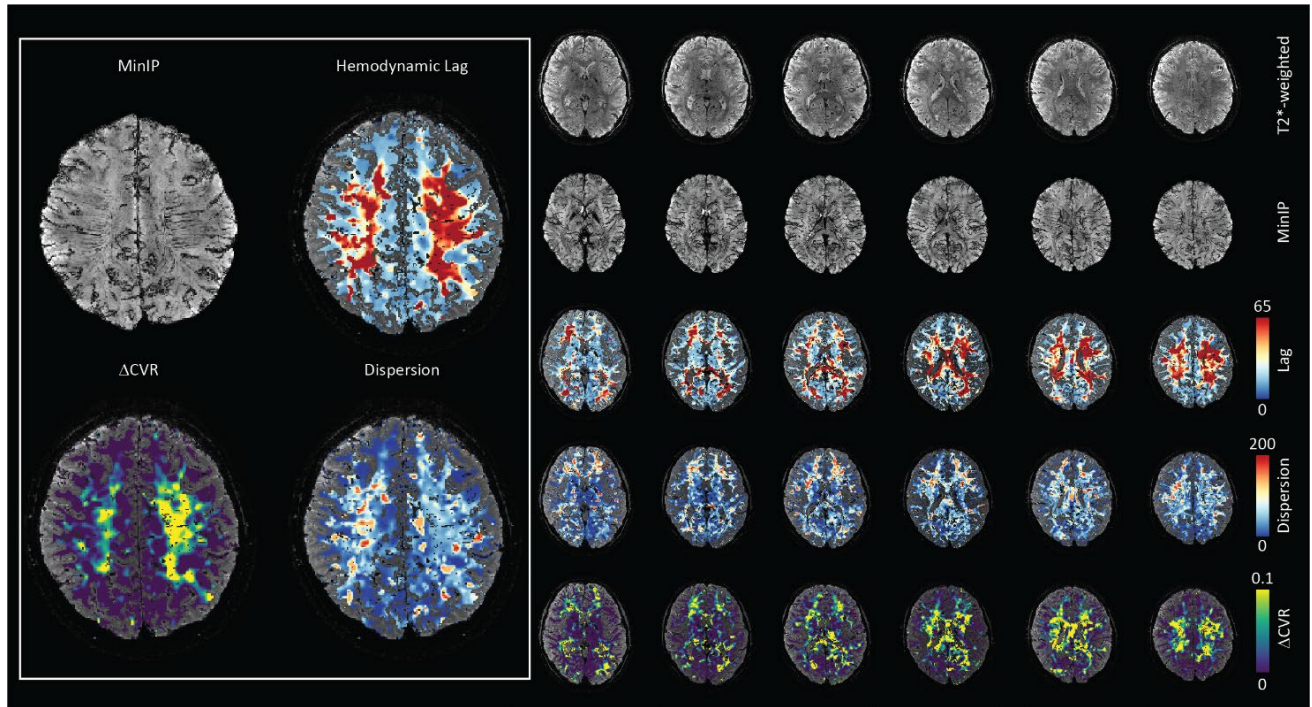

Figure 4: the MinIP and related hemodynamic parameter maps for a representative subject (19yrs, female) showing white matter lag, dispersion, and CVR difference maps. Spatial correlation between regions of temporally dispersed signals coincide with a larger magnitude in the corrected CVR. These are also regions with higher medullary vessel density as can be seen in the left inset.

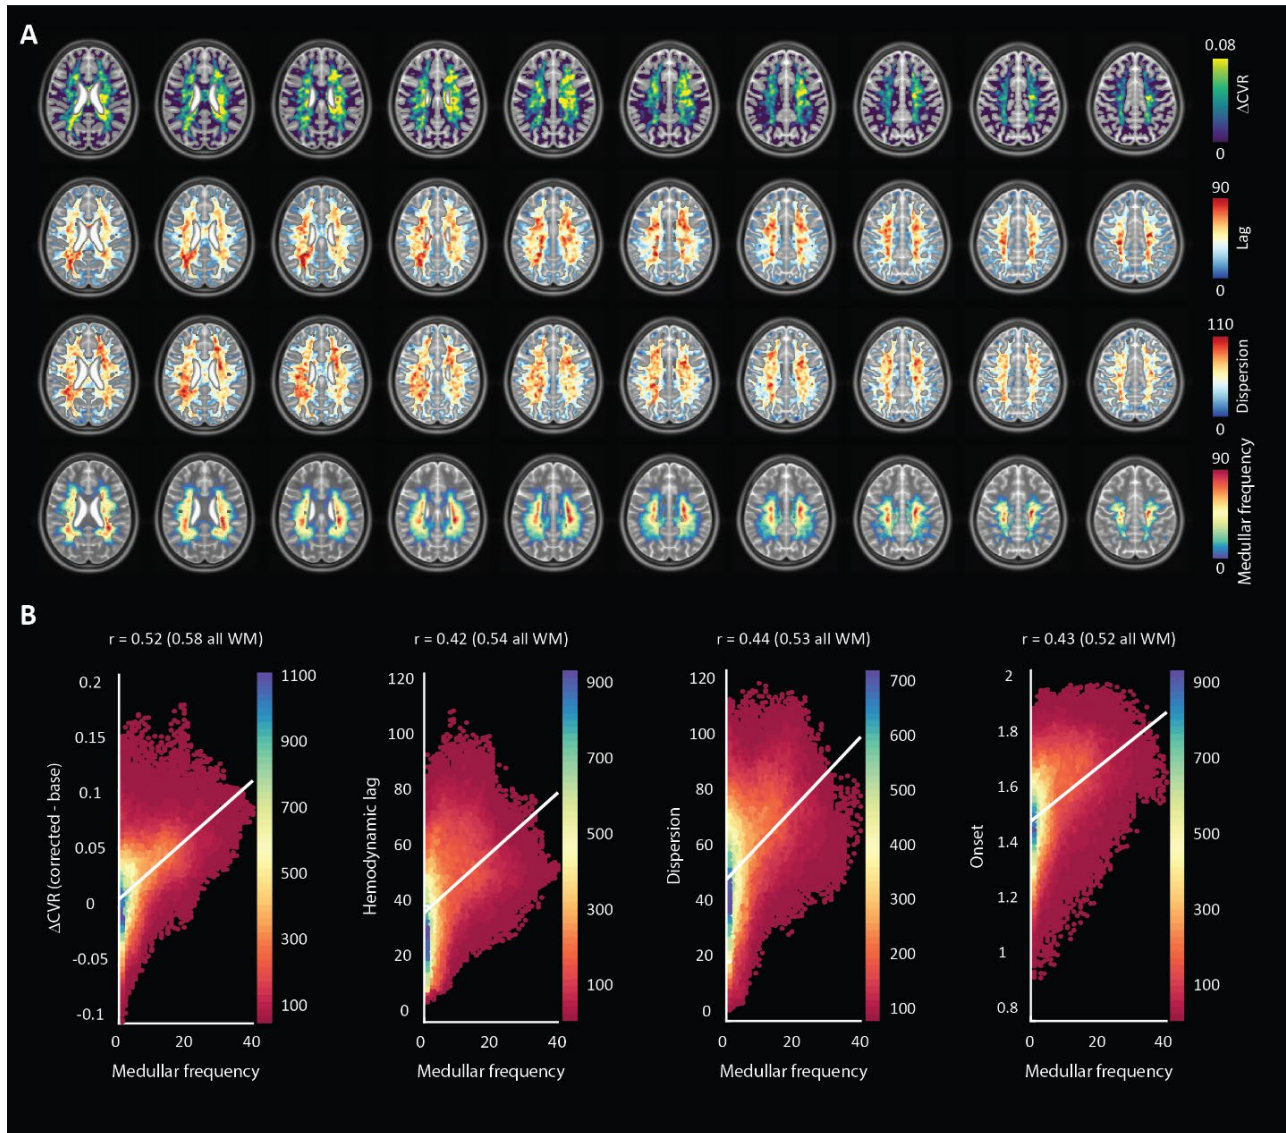

Figure 5A: MNI-averaged (1 mm) hemodynamic parameter maps for all subjects showing  $\Delta$ CVR, hemodynamic lag, and dispersion as well as the MNI-averaged medullar vein frequency atlas (bottom). Hemodynamic parameter maps were smoothed using a Gaussian kernel with a filter width of 5 voxels and an FWHM of 3mm; Figure 5B: heat-scatter plots showing the correlation between each parameter map with the medullar frequency map. A bin size of 50 was used and the color map represents the data counts for each bin. A depiction of the MNI slab included for correlation analysis along with heat-scatter plots comparing various hemodynamic parameters with one another are supplied in supplementary figure 2.

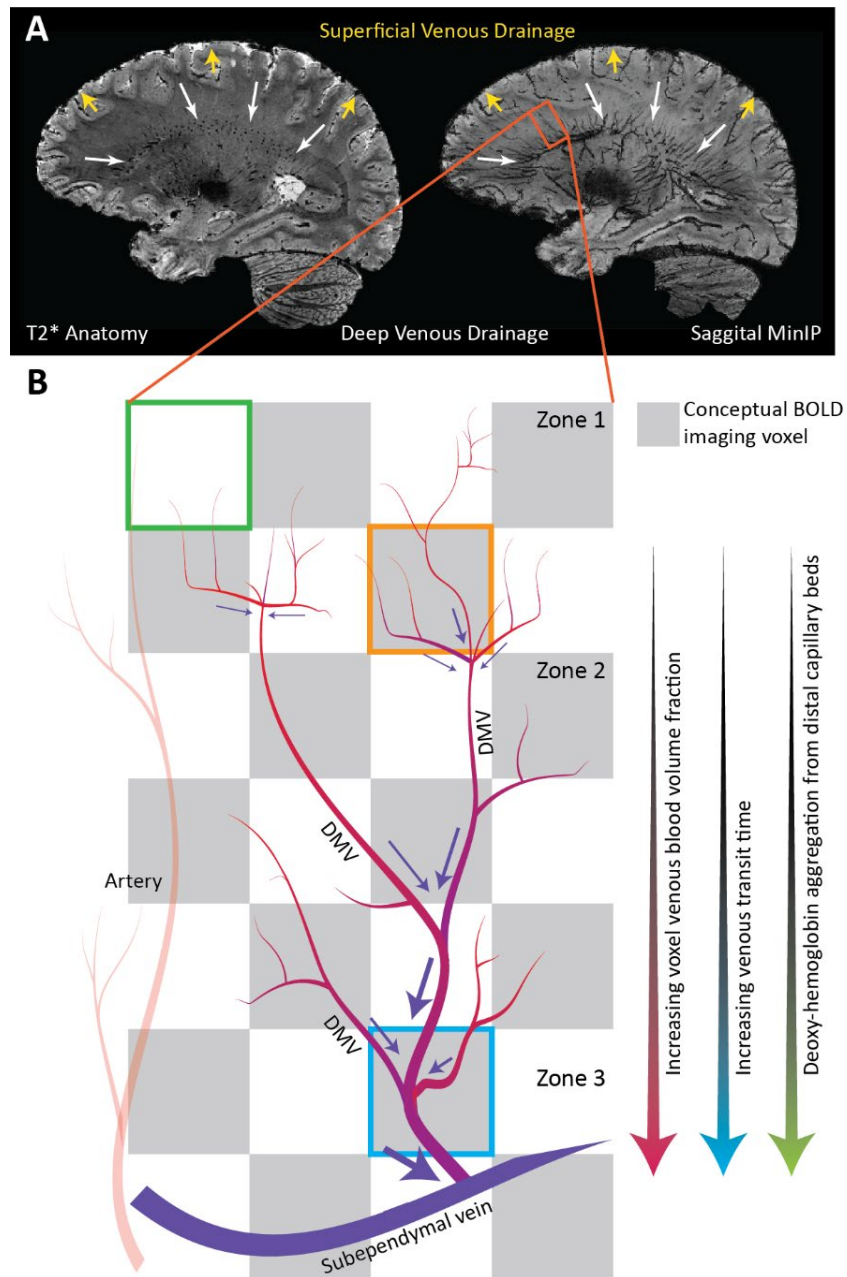

Figure 6A: A sagittal slice from a representative subject T2\*-weighted image. The corresponding MinIP is shown on the right. The venous drainage system can be separated into superficial and deep drainage networks. The superficial network drains cortical blood towards the superior sagittal sinus while the deep system drains white matter blood via the subependymal veins. The degree of collateral drainage between superficial and deep venous networks remains generally unclear. Figure 6B: The deep drainage architecture may have implications on the WM BOLD-CVR response to hypercapnia. In this conceptual representation, three representative BOLD voxels are considered. The green voxel contains very little venous blood volume. Here, reactive WM capillary beds may not evoke a strong BOLD signal response mainly due to the low total dHb content. Blood from such regions at the WM periphery join via tributaries at the second convergence zone (orange voxel). Here, the venous blood volume fraction increases appreciably, setting up the possibility to evoke stronger BOLD signal contrast. A similar effect occurs around zone 3 where visibly large medullary vessels come together. Moving inwards towards the ventricles, the total venous volume and total dHb content increase considerably. The venous transit time along with the congregation of blood from distal regions will lead to signal delays and dispersion. These effects are underscored when looking at signal increases in CVR maps after correcting for hemodynamic lag (figure 5).

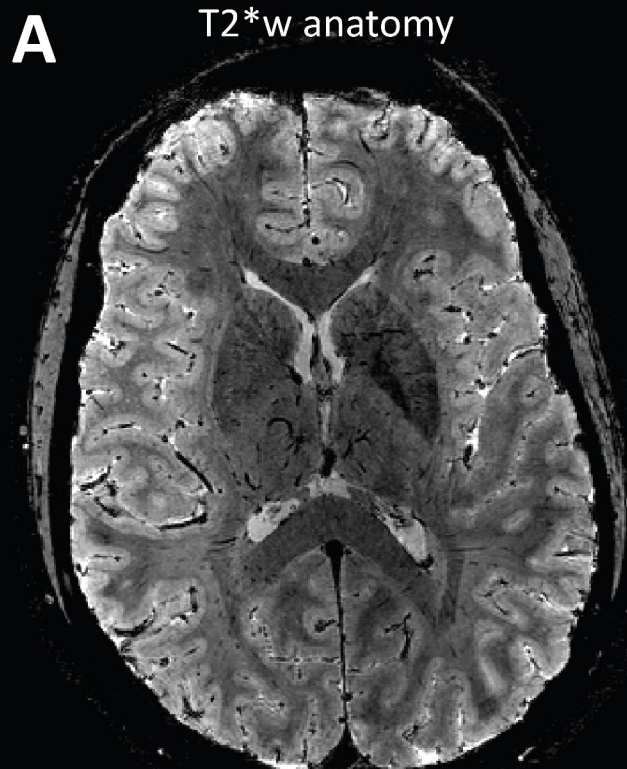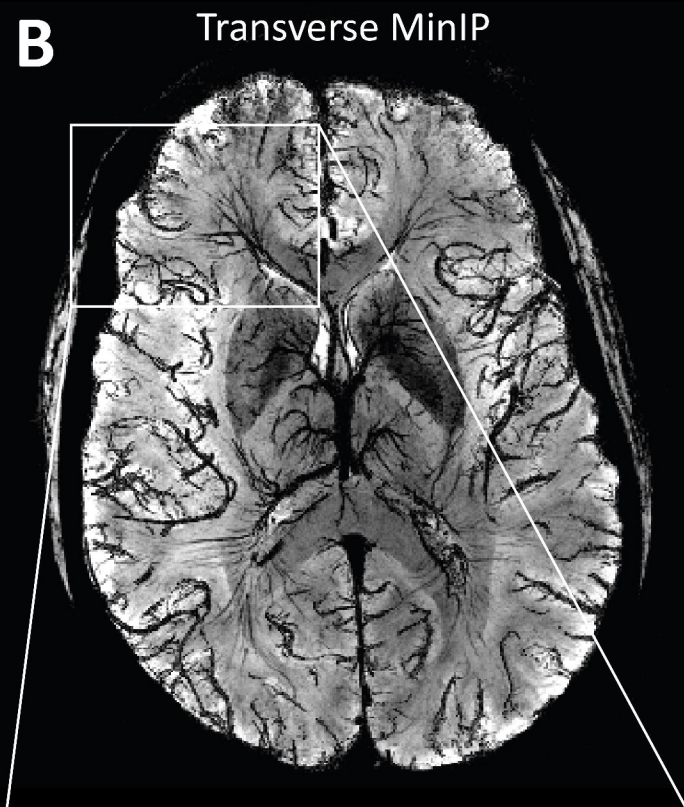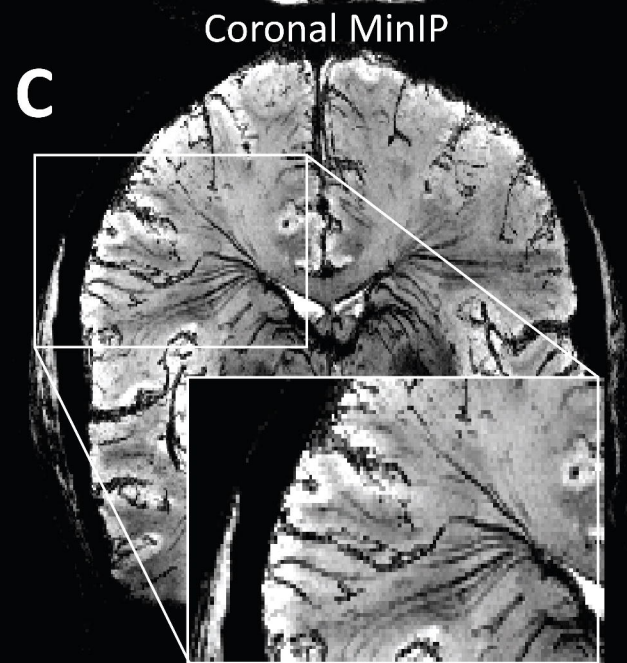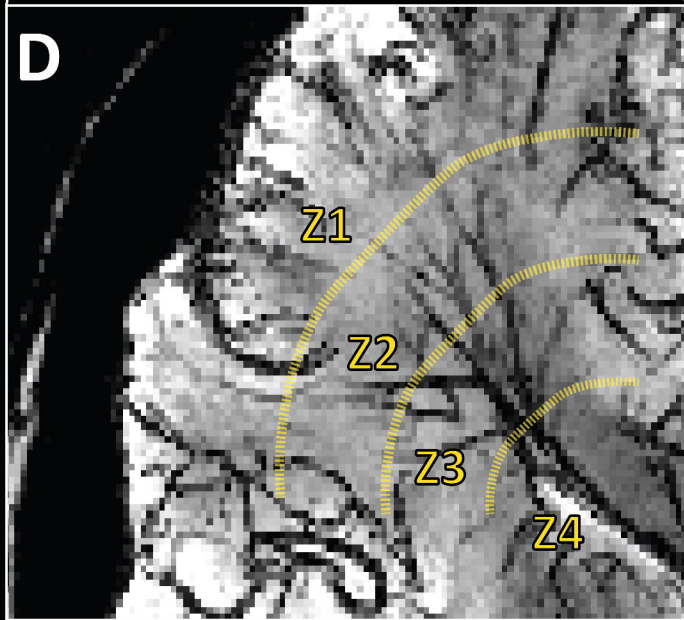

Deep medullary veins

Zones of convergence (schematic)



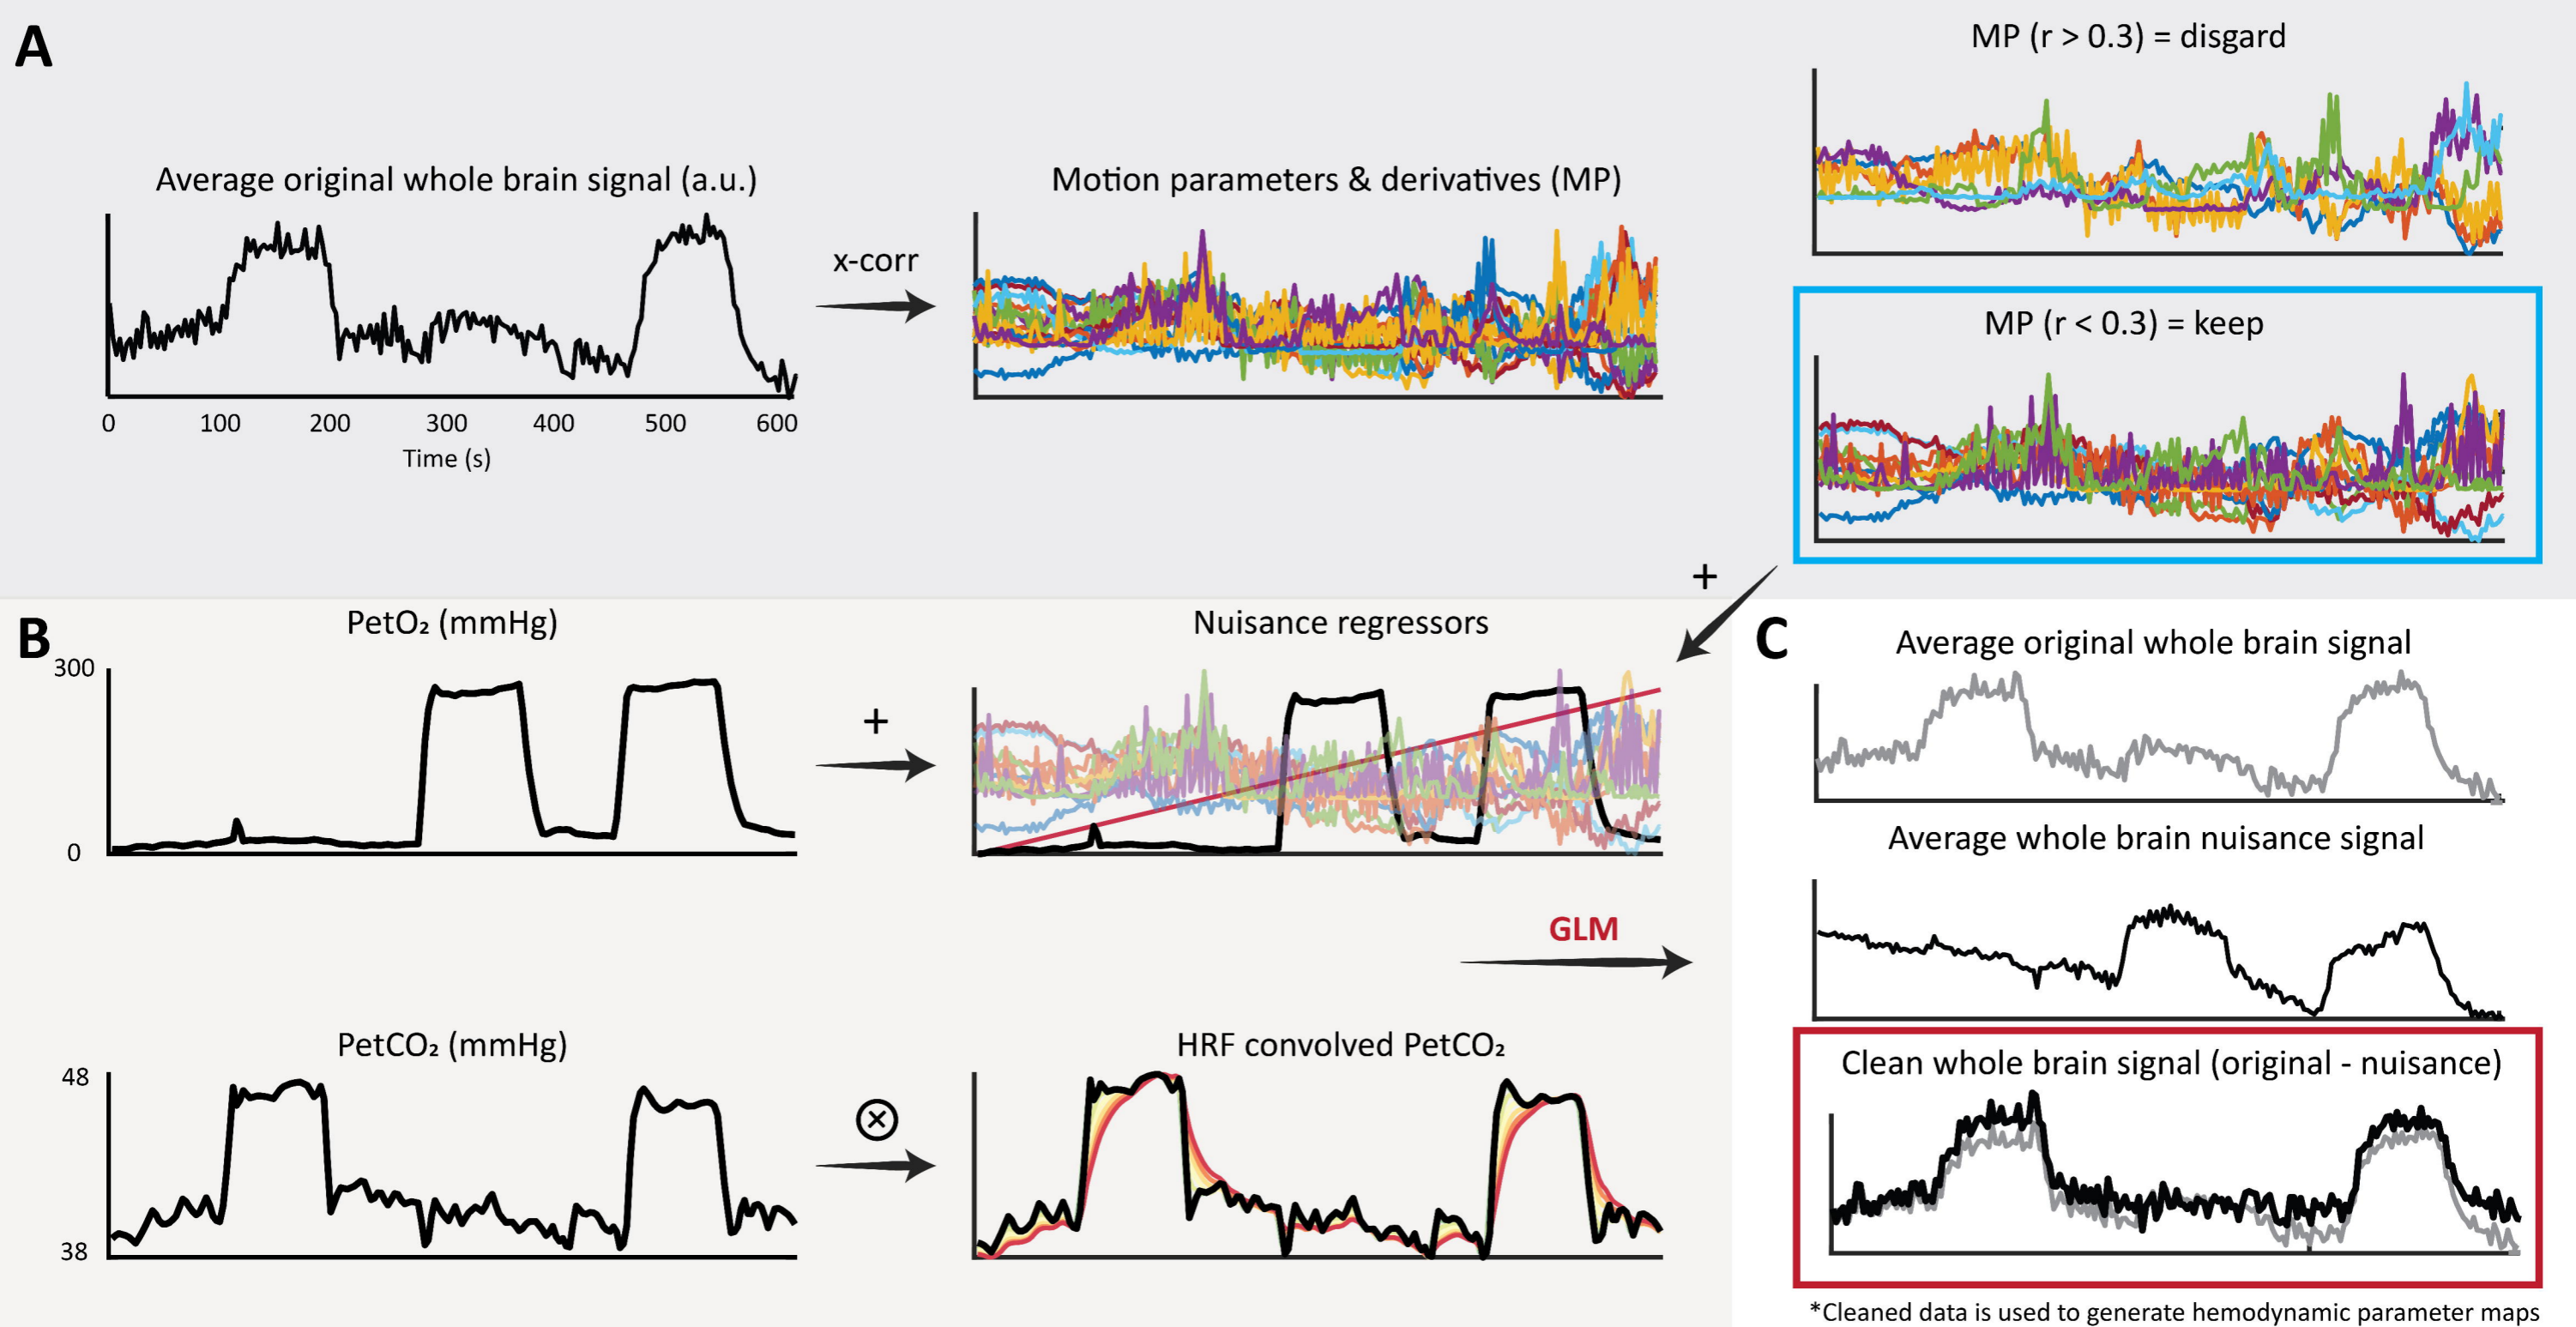

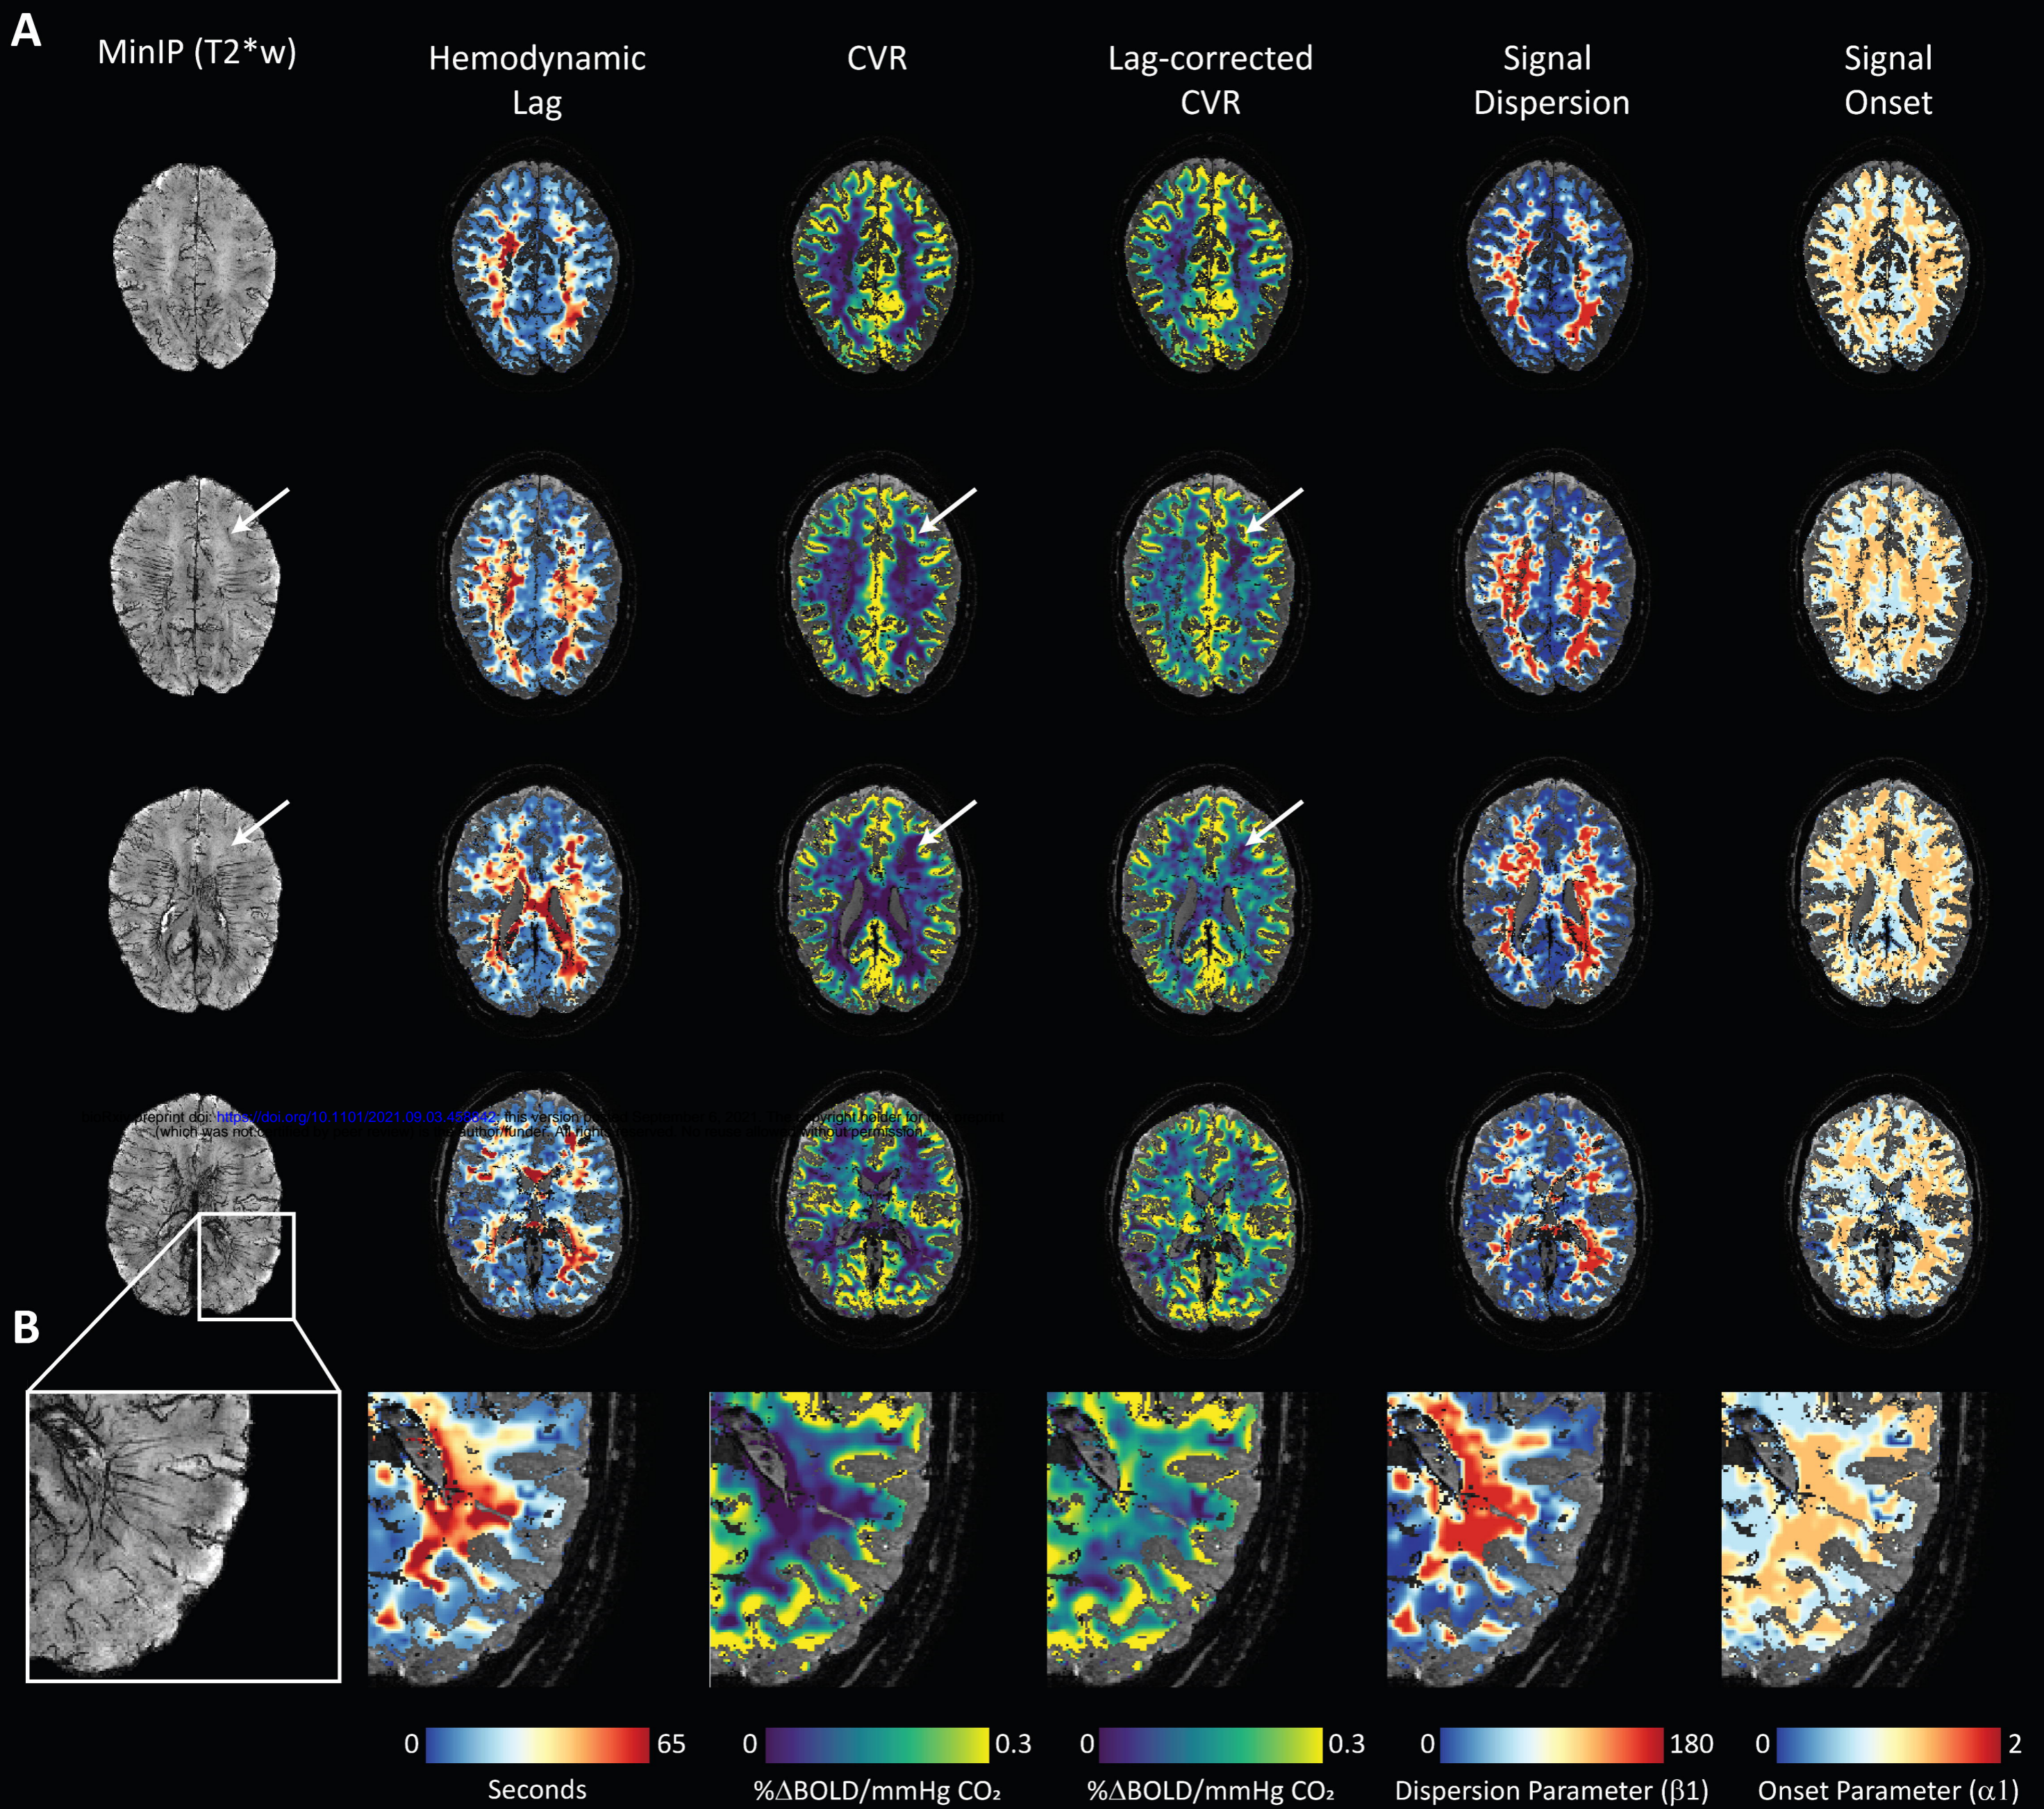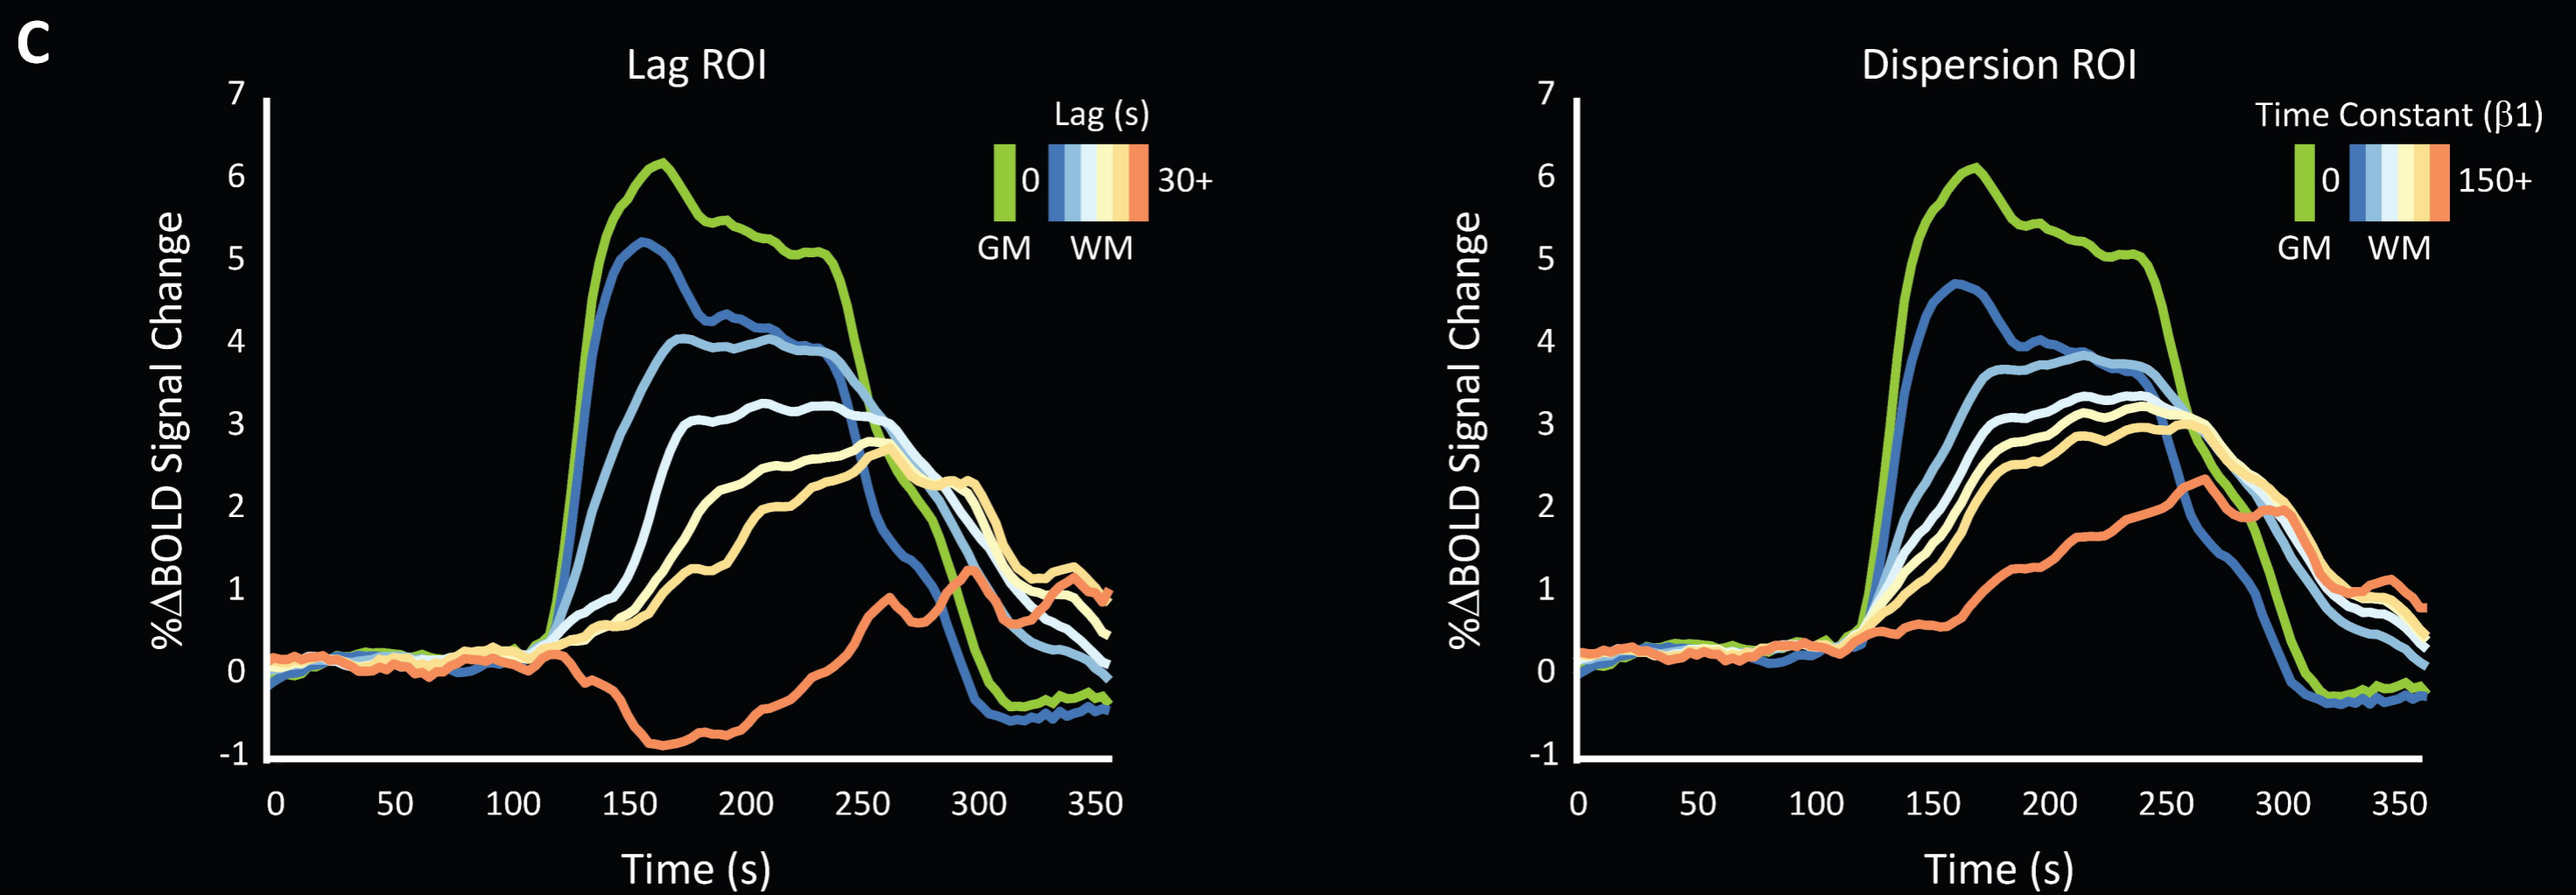

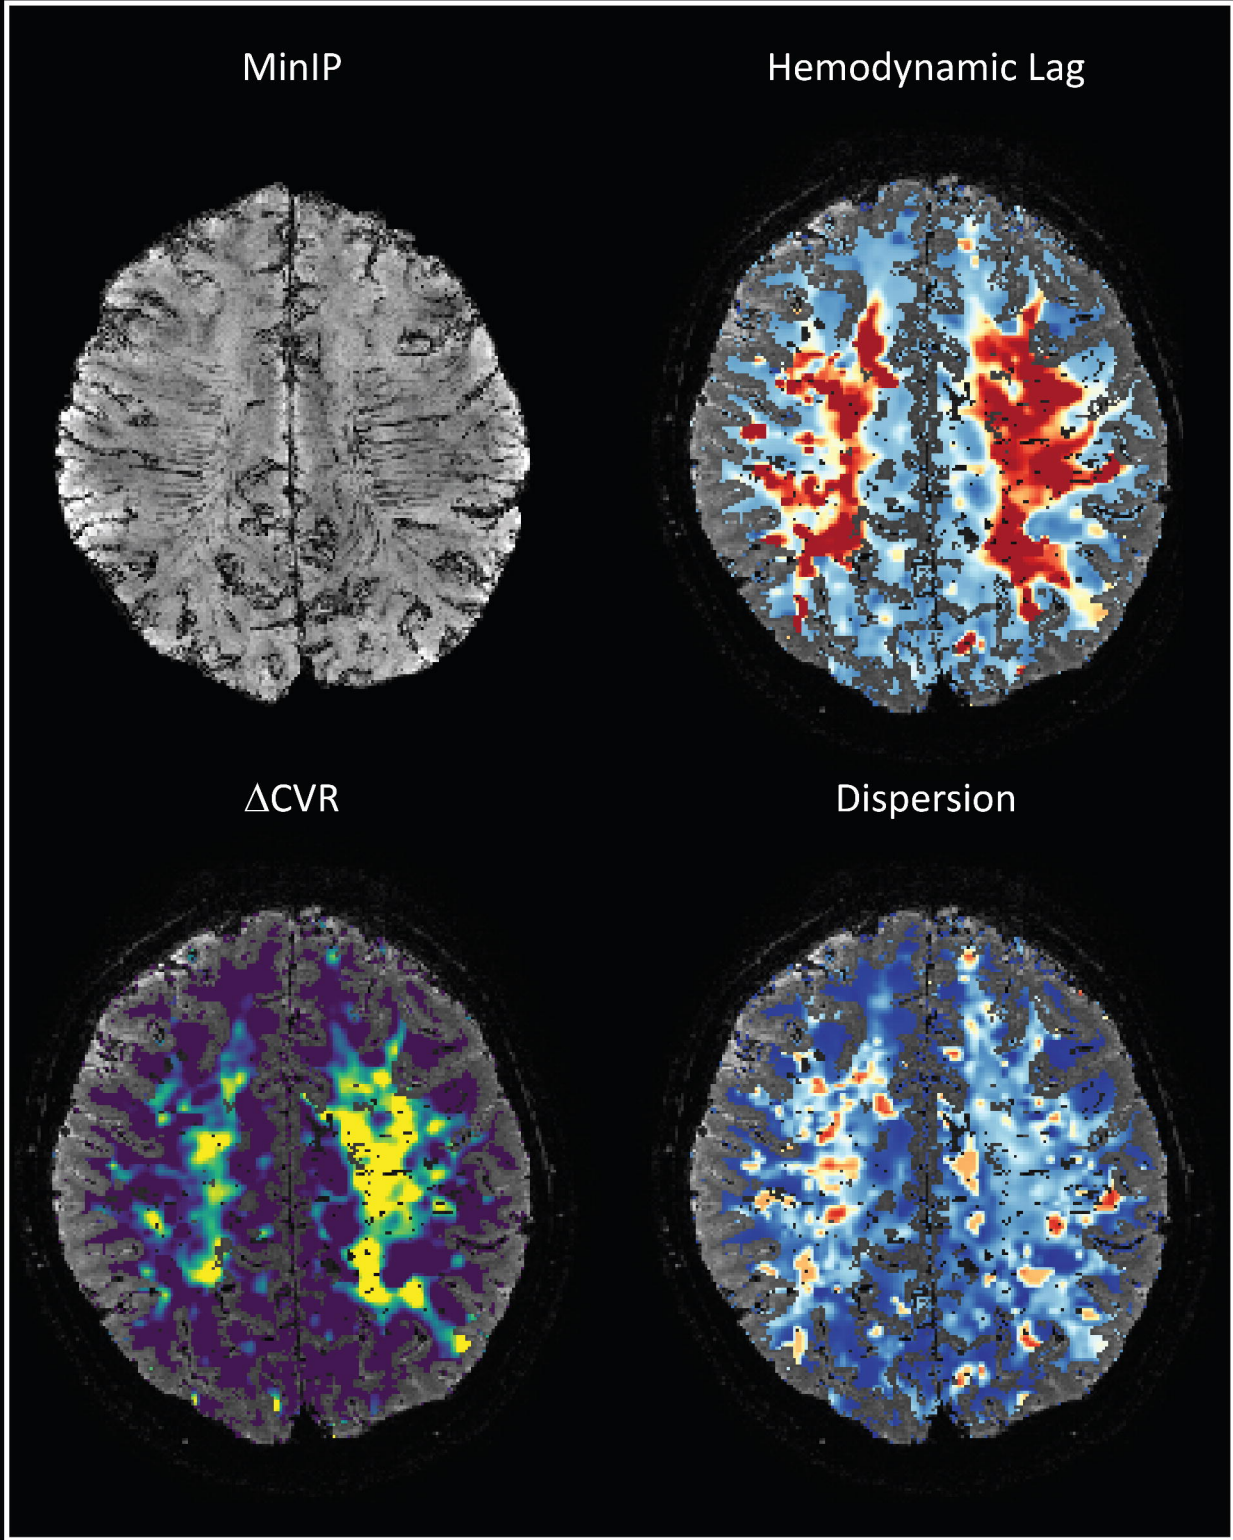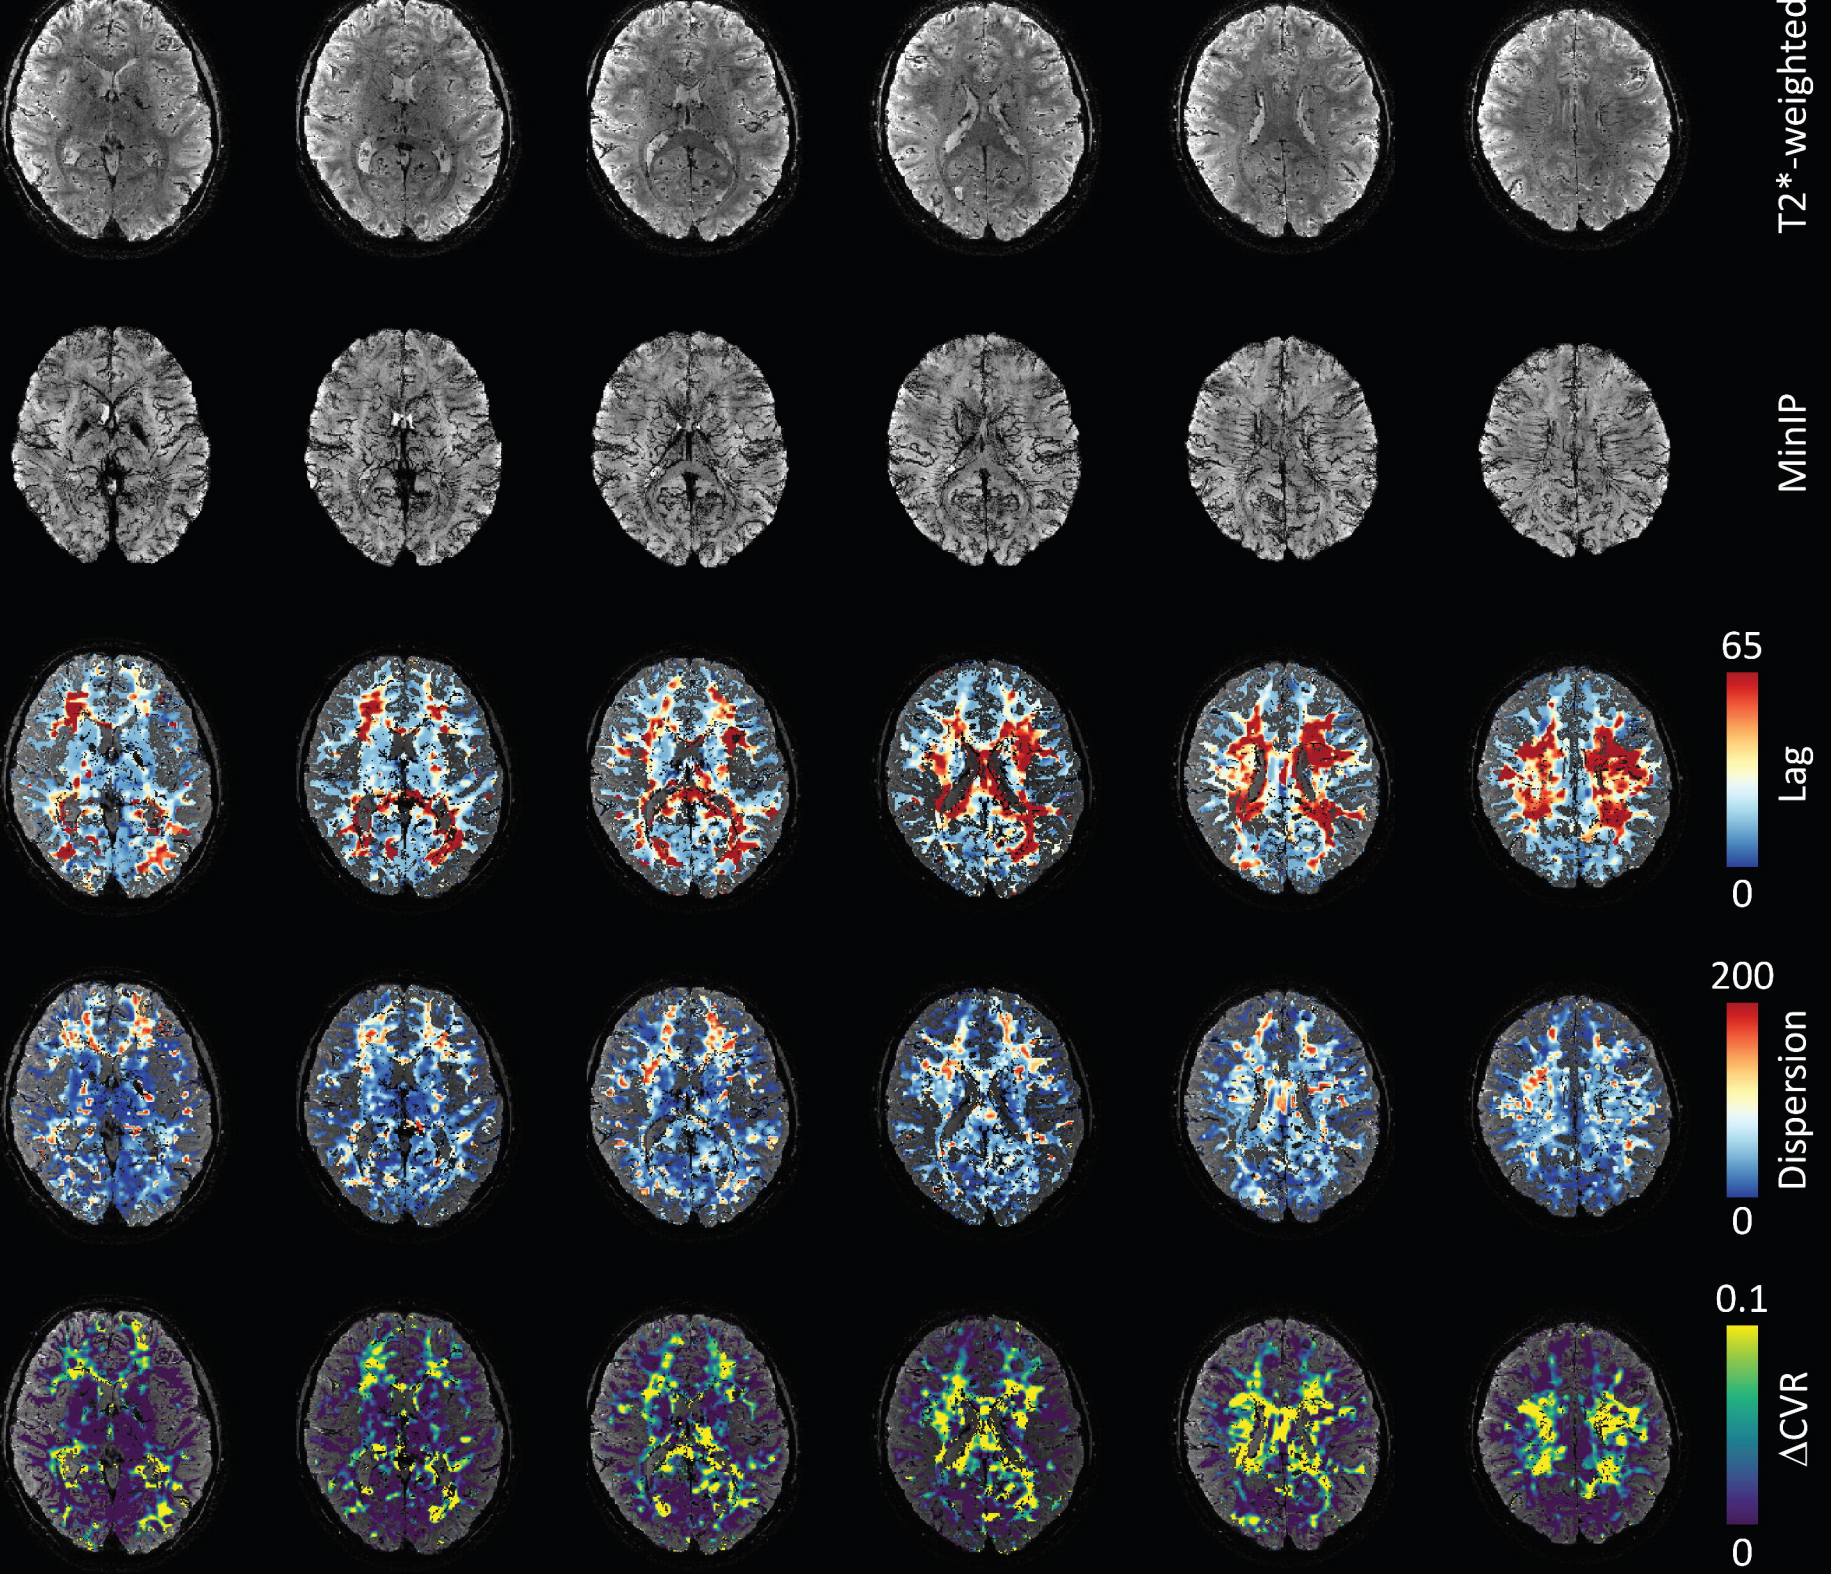

**A**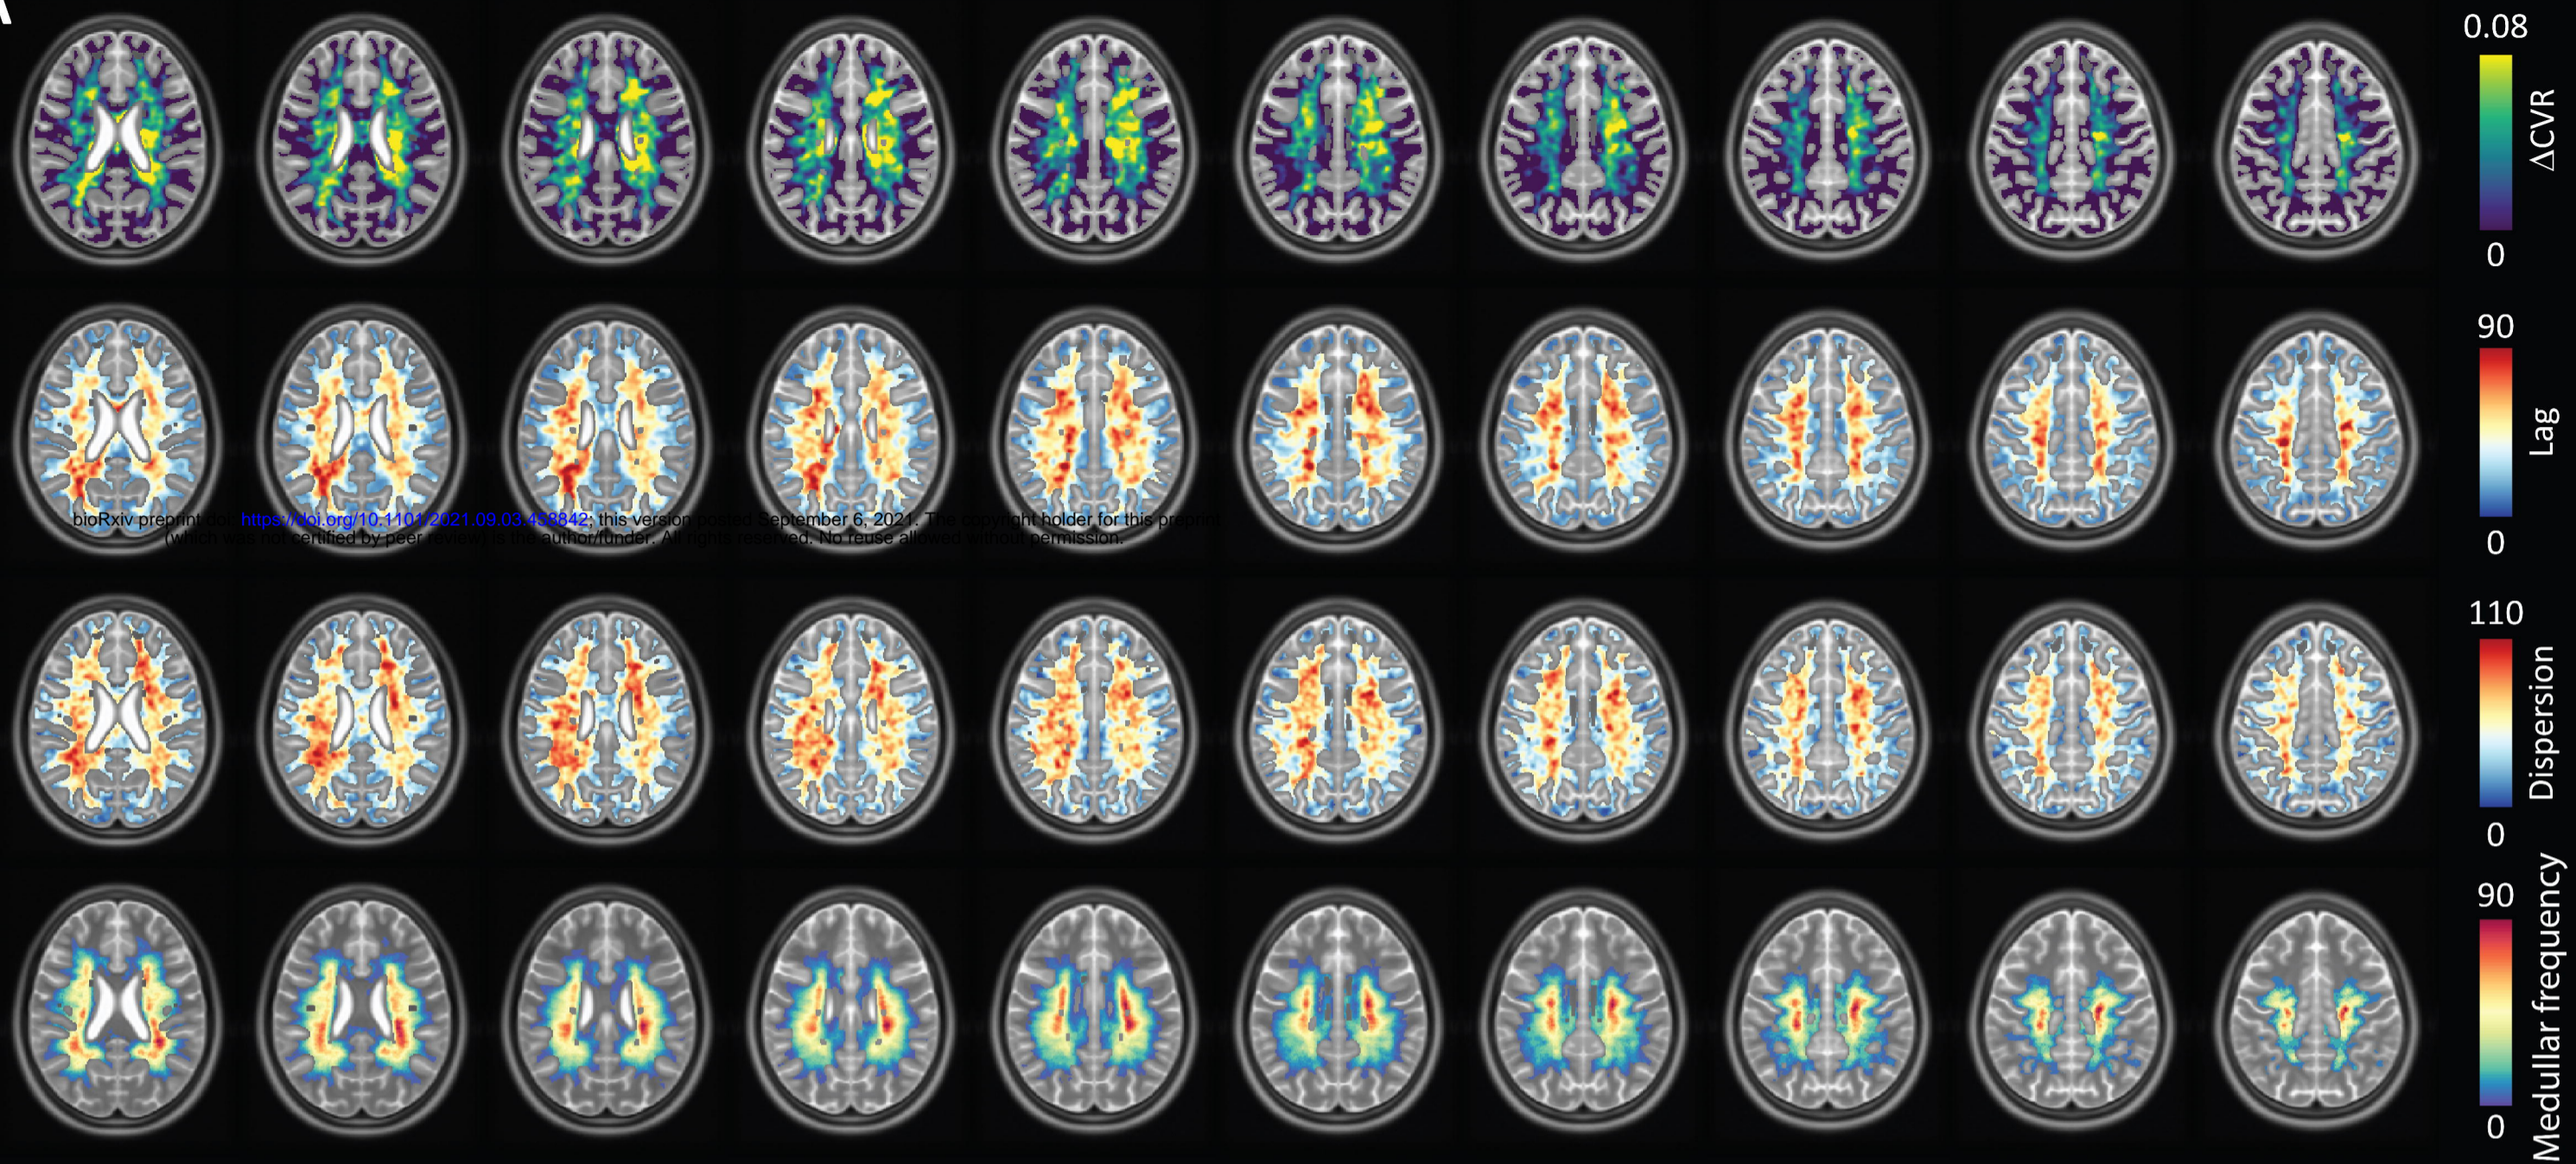**B**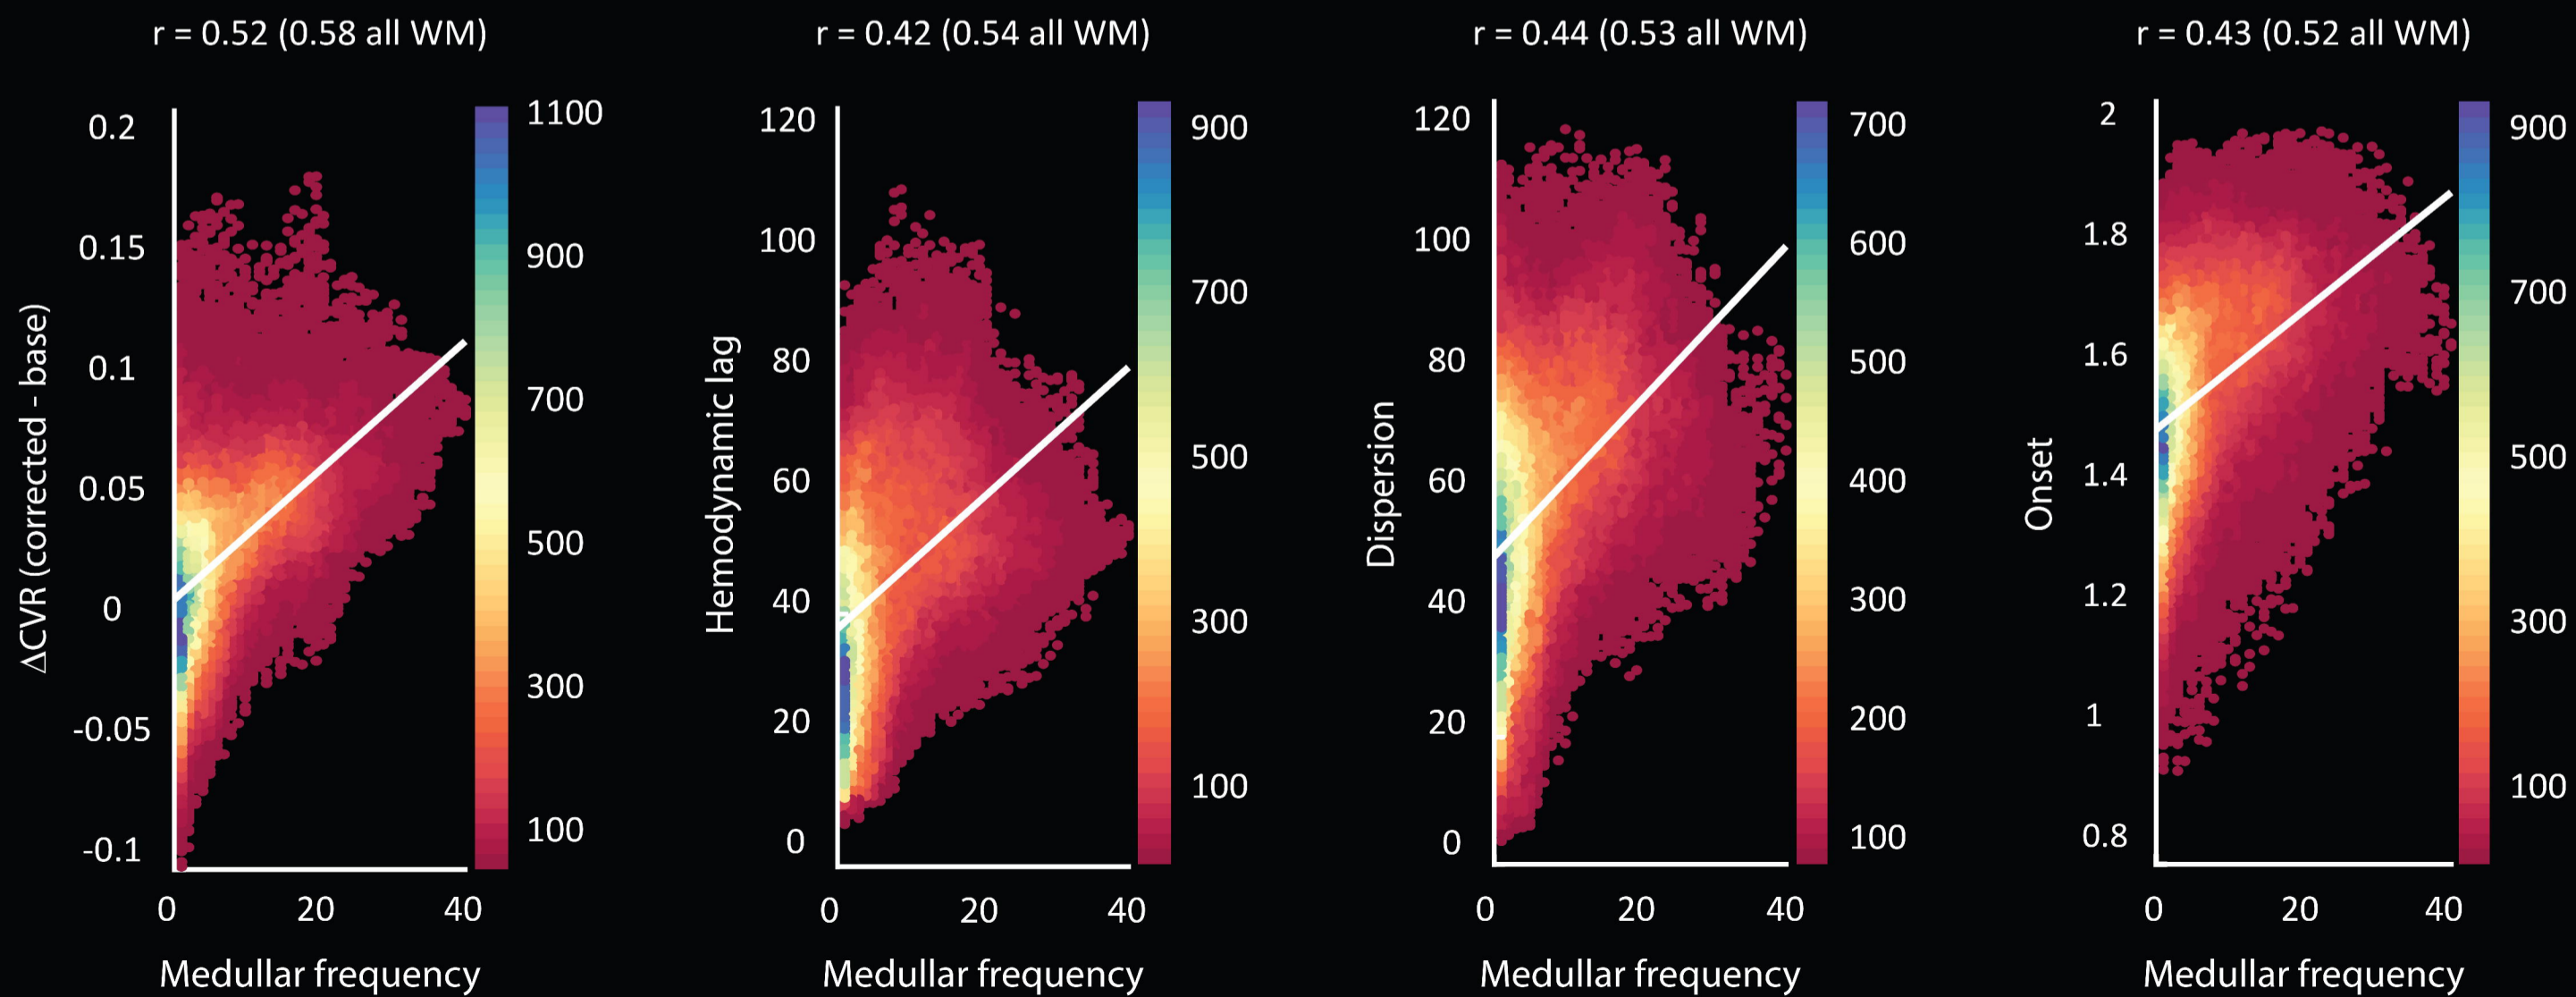

**A****Superficial Venous Drainage**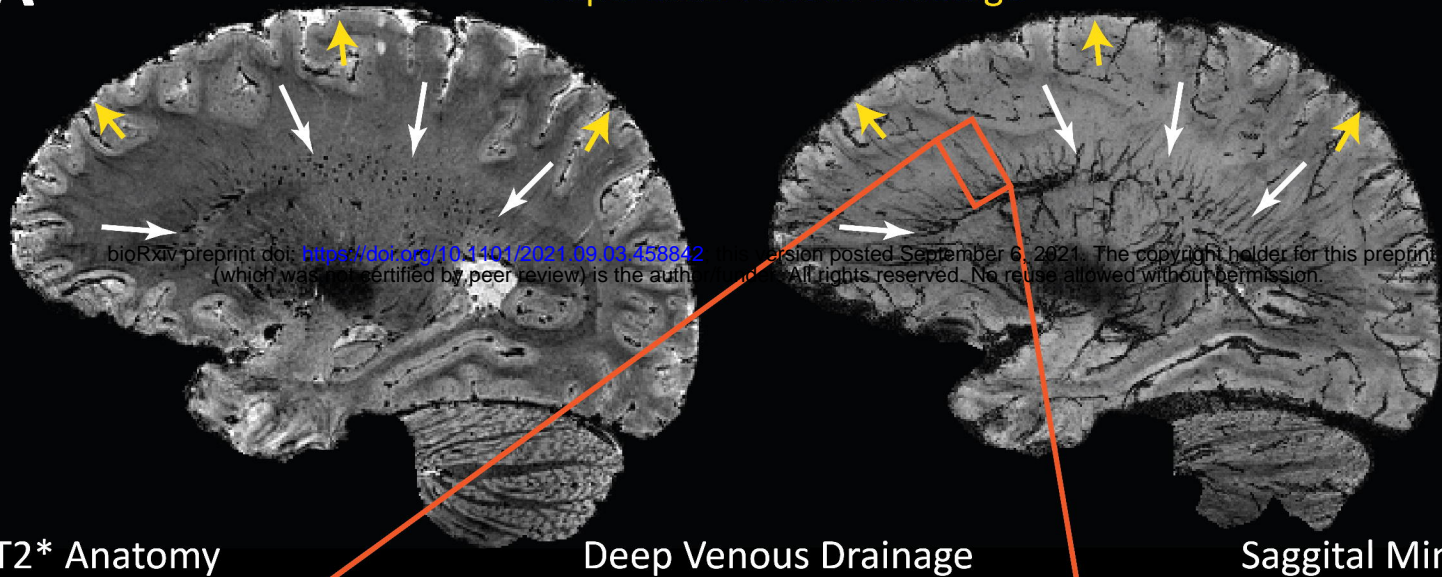

T2\* Anatomy

Deep Venous Drainage

Sagittal MinIP

**B**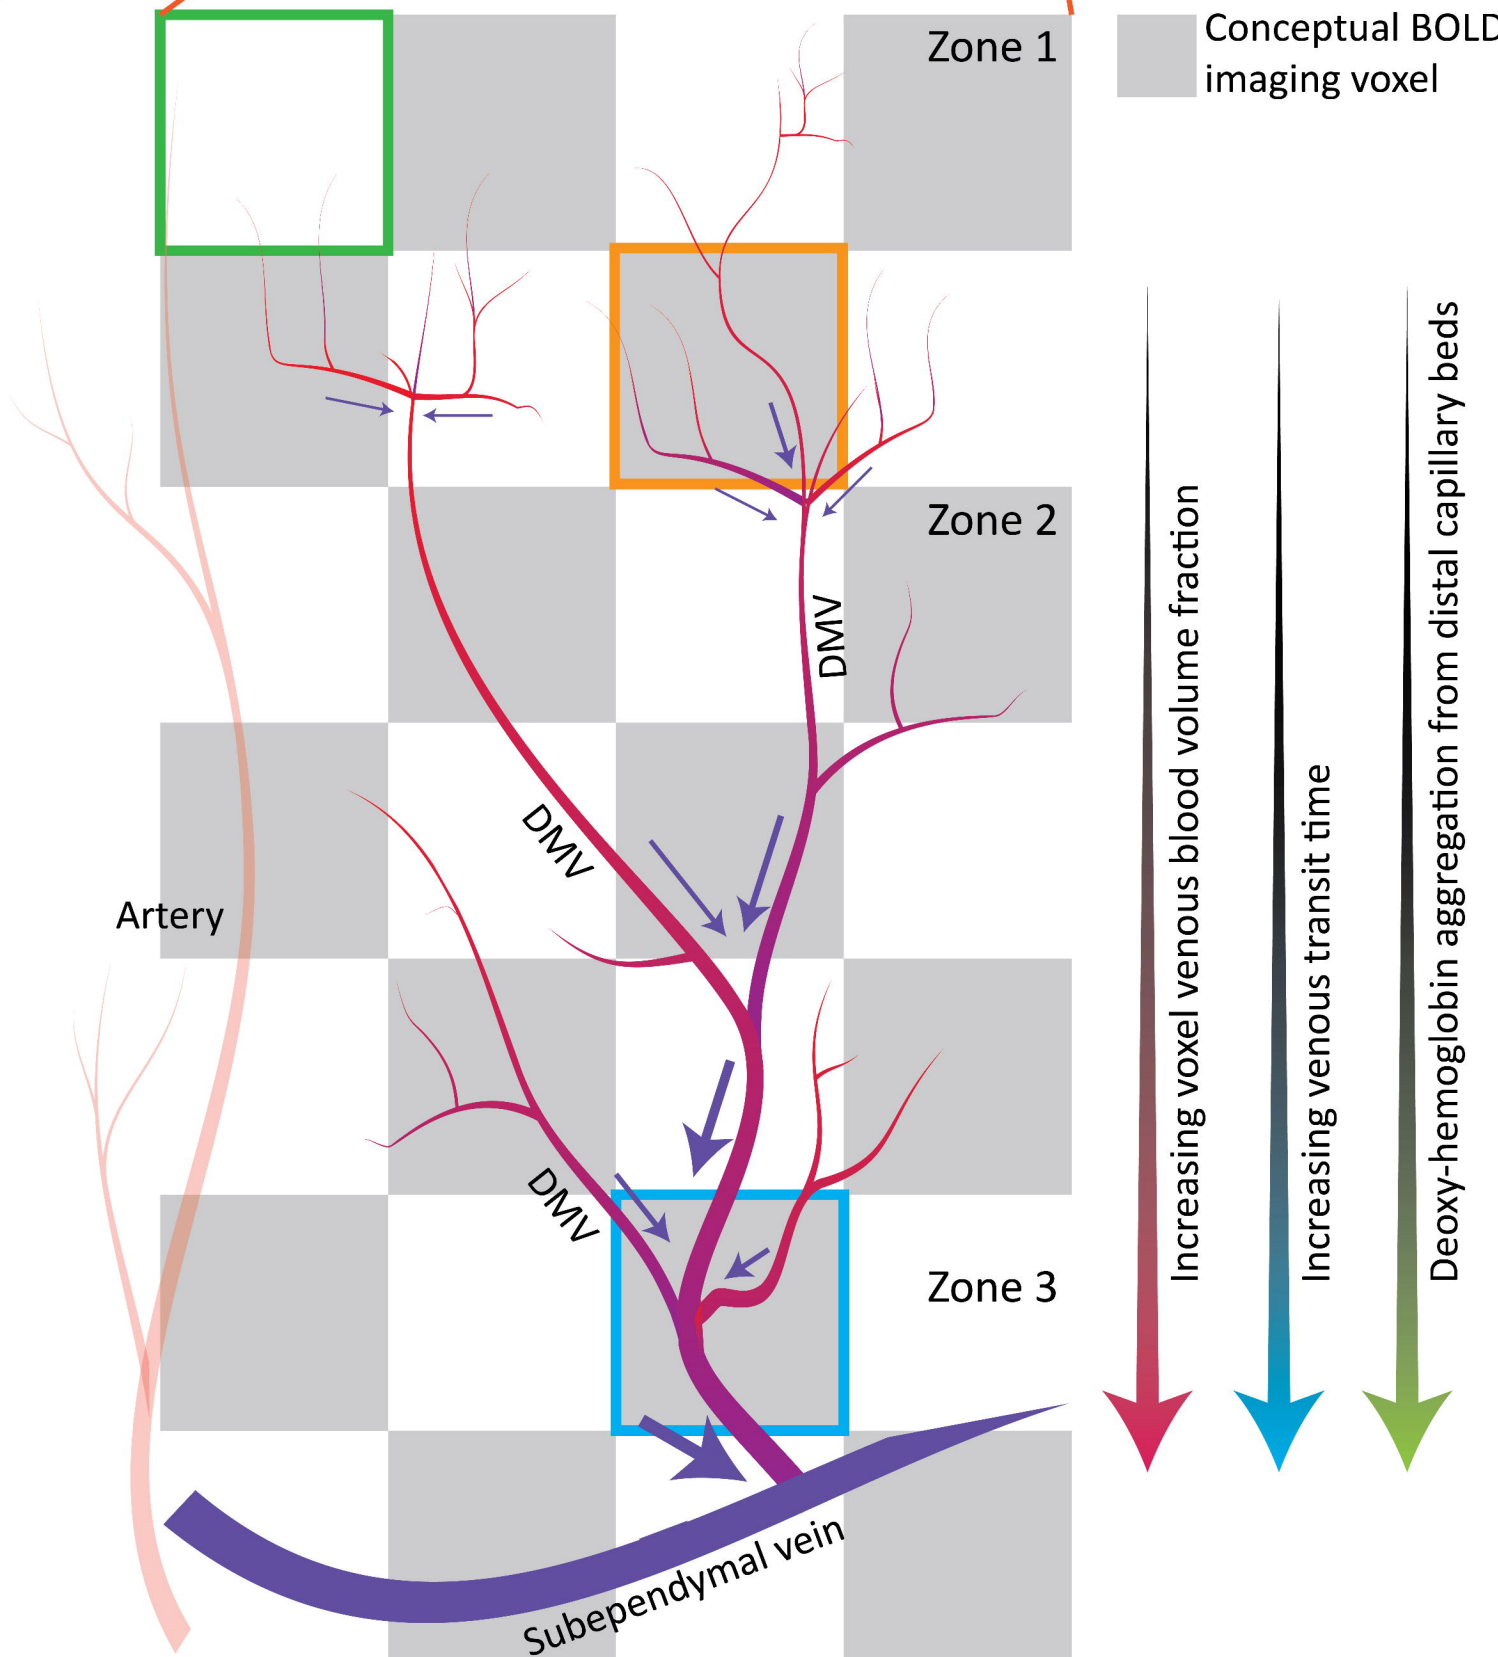

Source: https://www.biorxiv.org/content/10.1101/2021.09.03.458842v1.full.pdf
